# Supplementary material for: Construction of pyrazolo[5,1-a]isoindol-8(3aH)-one derivatives via phosphine-catalyzed cyclization of electron-deficient alkynes and N-amino substituted phthalimide
Source: Royal Society of Chemistry journal article supplement (doi:10.1039/c5ra17267e), 2015-12-24

## Supporting Information

### Construction of pyrazolo[5,1-a]isoindol-8(3aH)-one derivatives via phosphine-catalyzed cyclization of electron-deficient alkynes and N-amino substituted phthalimide

Qing-Fa Zhou, <sup>\*a,b</sup> Fei-Fei Ge, <sup>a</sup> Qin-Qin Chen, <sup>a</sup> Tao Lu <sup>\*a</sup>

<sup>a</sup> School of Basic Sciences, China Pharmaceutical University, Nanjing, 210009, P. R. China

<sup>b</sup> State Key Laboratory of Natural Medicines, China Pharmaceutical University, Nanjing, 210009, P. R. China  
E-mail: zhouqingfa@cpu.edu.cn and lut163@163.com

<sup>\*</sup>To whom correspondence should be addressed. Fax: +86-025-86285179; Tele.: +86-025-86185160

Table of Contents:

|                                                                                                           |    |
|-----------------------------------------------------------------------------------------------------------|----|
| 1. General Information.....                                                                               | 2  |
| 2. General Procedure for Reaction of electron-deficient alkynes with N-amino substituted phthalimide..... | 2  |
| 3. Spectral Data of the Products.....                                                                     | 3  |
| 4. Copies of <sup>1</sup> HNMR and <sup>13</sup> CNMR Spectra.....                                        | 11 |

## General information:

All reactions were performed in anhydrous solvents under an N<sub>2</sub> atmosphere. THF, Et<sub>2</sub>O, and toluene were distilled from K and Na metal, respectively. DMF, CH<sub>2</sub>Cl<sub>2</sub> and acetone were distilled from CaH<sub>2</sub>. CH<sub>3</sub>CN was distilled from P<sub>2</sub>O<sub>5</sub>. PE refers to petroleum ether (boiling range 60–90 °C). Ethyl propiolate, methyl propiolate, dimethyl but-2-ynedioate and but-3-yn-2-one are commercially available without further purification. Other alkynoates<sup>[1]</sup> and alkyne ketones<sup>[2]</sup> were prepared following known procedures. N-(1,3-Dioxoisindolin-2-yl)-sulfonamide(N-amino substituted phthalimide was prepared following known procedures.<sup>[3]</sup> Reaction progress was monitored using thin layer chromatography (TLC), which was visualized by ultraviolet light (254 nm). Flash chromatography was conducted with silica gel 200–300 mesh. Melting points were obtained on a Yanaco-241 apparatus and are uncorrected. <sup>1</sup>H and <sup>13</sup>C NMR spectra were recorded in DMSO-d<sub>6</sub> using a Bruker Avance 300 spectrometer: chemical shifts (δ) are given in parts per million, coupling constants (*J*) in Hz. High-resolution mass spectra were recorded on a Waters/Micromass QTOF MS spectrometer.

## General procedure for reaction of electron-deficient alkynes with N-hydroxyphthalimide:

General experimental conditions: To the solution of electron-deficient alkyne (0.36 mmol) and N-(1,3-dioxoisindolin-2-yl)-4-methylbenzenesulfonamide (94.8 mg, 0.3 mmol) (94.8 mg, 0.3 mmol) in dry DMF (1 mL) was added Ph<sub>3</sub>P (15.7 mg, 0.06 mmol). The resulting mixture was stirred at room temperature under nitrogen atmosphere for the required period of time. After completion of the reaction as monitored by TLC, the reaction mixture was quenched with CH<sub>2</sub>Cl<sub>2</sub> (15 mL), which was washed with water and brine successively, dried over MgSO<sub>4</sub>, filtered, and concentrated in vacuo. Purification by flash chromatography (SiO<sub>2</sub>; ethylacetate/PE, 1:6~1:1) yielded the desired products.

[1] M. Newcomb, N. Miranda, X. Huang, D. Crich, *J. Am. Chem. Soc.* **2000**, 122, 6128.

[2] B.G. Van den Hoven, B. El Ali, H. Alper, *J. Org. Chem.* **2000**, 65, 4131.

[3] O. M. A. Hafez, K. M. Amin, N. A. Abdel-Latif, T. K. Mohamed, E. Y. Ahmed, T. Maher *Eur. J. Med. Chem.* **2009**, 44, 2957.

### Spectral data of the products:

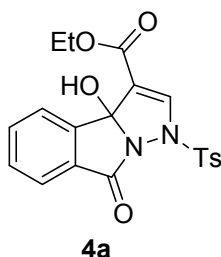

White solid; m.p. 99-101 °C;  $^1\text{H}$  NMR (300 MHz, DMSO)  $\delta$  7.86-7.72 (m, 6H), 7.63-7.42 (m, 3H), 7.10 (s, 1H), 4.15 (q,  $J = 7.1$  Hz, 2H), 2.41 (s, 3H), 1.23 (t,  $J = 7.1$  Hz, 3H);  $^{13}\text{C}$  NMR (75 MHz, DMSO)  $\delta$  172.50, 161.12, 145.97, 145.36, 142.31, 134.87, 131.05, 130.40, 129.71, 128.96, 127.96, 126.55, 123.86, 120.56, 97.28, 60.53, 21.19, 13.91; HRMS (ESI): calcd. for  $\text{C}_{20}\text{H}_{18}\text{N}_2\text{NaO}_6\text{S}$   $[\text{M}+\text{Na}]^+$  437.0778, found 437.0777.

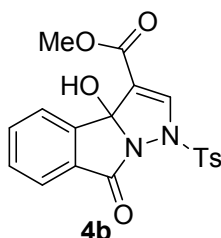

White solid; m.p. 118-120 °C ;  $^1\text{H}$  NMR (300 MHz, DMSO)  $\delta$  7.86-7.74 (m, 6H), 7.63-7.42 (m, 3H), 7.09 (s, 1H), 3.66 (s, 3H), 2.41 (s, 3H);  $^{13}\text{C}$  NMR (75 MHz, DMSO)  $\delta$  172.51, 161.56, 145.98, 145.38, 142.39, 134.93, 131.00, 130.41, 129.72, 128.96, 127.95, 126.49, 123.88, 120.25, 97.27, 51.69, 21.19; HRMS (ESI): calcd. for  $\text{C}_{19}\text{H}_{16}\text{N}_2\text{NaO}_6\text{S}$   $[\text{M}+\text{Na}]^+$  423.0621, found 423.0623.

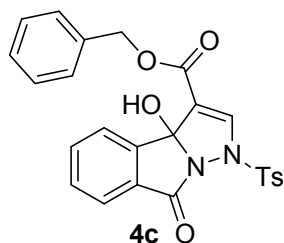

White solid; m.p. 97-99 °C ;  $^1\text{H}$  NMR (300 MHz, DMSO)  $\delta$  7.83-7.57 (m, 7H), 7.45-7.37 (m, 7H), 7.14 (s, 1H), 5.21-5.12 (m, 2H), 2.41 (s, 3H);  $^{13}\text{C}$  NMR (75 MHz, DMSO)  $\delta$  172.47, 160.95, 145.87, 145.39, 142.79, 135.62, 134.76, 131.03, 130.41, 129.70, 128.95, 128.39, 128.12, 128.06, 127.94, 126.55, 123.86, 120.22, 97.28, 65.91, 21.20; HRMS (ESI): calcd. for  $\text{C}_{25}\text{H}_{20}\text{N}_2\text{NaO}_6\text{S}$   $[\text{M}+\text{Na}]^+$  499.0934, found 499.0944.

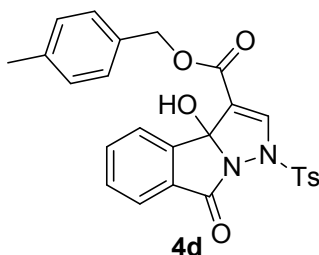

White solid; m.p. 97-99 °C ;  $^1\text{H}$  NMR (300 MHz, DMSO)  $\delta$  7.80-7.56 (m, 7H), 7.44-7.16 (m, 6H), 7.11 (s, 1H), 5.16-5.06 (m, 2H), 2.41 (s, 3H), 2.30 (s, 3H);  $^{13}\text{C}$  NMR (75 MHz, DMSO)  $\delta$  172.47, 160.96,

145.87, 145.38, 142.68, 137.50, 134.76, 132.56, 131.03, 130.40, 129.71, 128.94, 128.28, 127.93, 126.58, 123.85, 120.30, 97.27, 65.88, 21.19, 20.72; HRMS (ESI): calcd. for  $C_{26}H_{22}N_2NaO_6S$   $[M+Na]^+$  513.1091, found 513.1088.

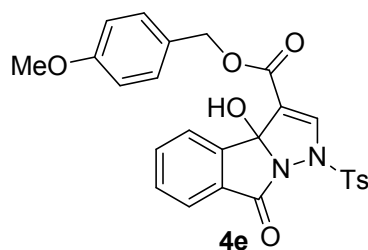

White solid; m.p. 153-156 °C ;  $^1H$  NMR (300 MHz, DMSO)  $\delta$  7.79-7.57 (m, 7H), 7.44-7.31 (m, 4H), 7.10-6.92 (m, 3H), 5.11-5.05(m,2H), 3.75 (s, 3H), 2.41 (s, 3H);  $^{13}C$  NMR (75 MHz, DMSO)  $\delta$  172.45, 160.98, 159.25, 145.86, 145.36, 142.58, 134.72, 131.05, 130.38, 130.11, 129.69, 128.93, 127.93, 127.44, 126.59, 123.82, 120.37, 113.78, 97.26, 65.28, 55.08, 21.17; HRMS (ESI): calcd. for  $C_{26}H_{22}N_2NaO_7S$   $[M+Na]^+$  529.1040, found 529.1050.

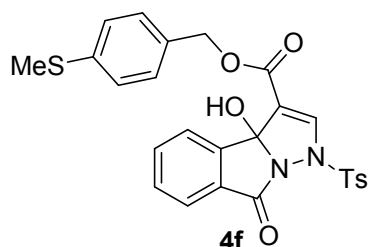

White solid; m.p. 111-114 °C ;  $^1H$  NMR (300 MHz, DMSO)  $\delta$  7.79-7.58 (m, 7H), 7.44-7.25 (m, 6H), 7.11 (s, 1H), 5.14-5.08 (m, 2H), 2.47 (s, 3H), 2.41 (s, 3H);  $^{13}C$  NMR (75 MHz, DMSO)  $\delta$  172.45, 160.93, 145.86, 145.37, 142.73, 138.32, 134.76, 132.08, 131.03, 130.40, 129.69, 128.96, 128.93, 127.92, 136.54, 125.79, 123.84, 120.22, 97.25, 65.62, 21.18, 14.60; HRMS (ESI): calcd. for  $C_{26}H_{22}N_2NaO_6S_2$   $[M+Na]^+$  545.0811, found 545.0817.

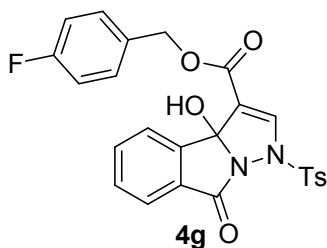

White solid; m.p. 180-182 °C ;  $^1H$  NMR (300 MHz, DMSO)  $\delta$  7.82-7.57 (m, 7H), 7.47-7.17 (m, 6H), 7.12 (s, 1H), 5.19-5.10 (m, 2H), 2.41 (s, 3H);  $^{13}C$  NMR (75 MHz, DMSO)  $\delta$  172.47, 163.54 ( $J_{CF}$  =195.75Hz), 160.30, 145.86, 145.40, 142.86, 134.77, 131.90( $J_{CF}$  =2.25Hz), 131.04, 130.54, 130.43, 129.71, 128.95, 127.94, 126.54, 123.87, 120.15, 115.36( $J_{CF}$  =21Hz), 97.27, 65.23, 21.19; HRMS (ESI): calcd. for  $C_{25}H_{19}FN_2NaO_6S$   $[M+Na]^+$  517.0840, found 517.0850.

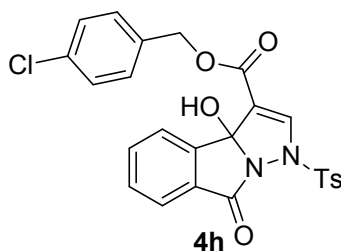

White solid; m.p. 161-163 °C ; <sup>1</sup>H NMR (300 MHz, DMSO) δ 7.84-7.57 (m, 7H), 7.45-7.39 (m, 6H), 7.13 (s, 1H), 5.20-5.11 (m, 2H), 2.41 (s, 3H); <sup>13</sup>C NMR (75 MHz, DMSO) δ 172.46, 160.89, 145.86, 145.39, 142.93, 134.79, 134.69, 132.77, 131.03, 130.43, 129.95, 129.71, 128.95, 128.38, 127.94, 126.50, 123.88, 120.05, 97.26, 65.08, 21.19; HRMS (ESI): calcd. for C<sub>25</sub>H<sub>19</sub>ClN<sub>2</sub>NaO<sub>6</sub>S [M+Na]<sup>+</sup> 533.0545, found 533.0551.

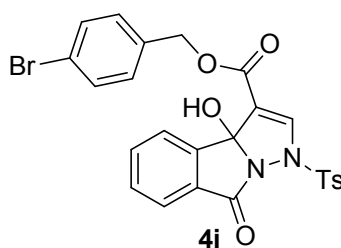

White solid; m.p. 137-139 °C ; <sup>1</sup>H NMR (300 MHz, DMSO) δ 7.85-7.68 (m, 6H), 7.62-7.55 (m, 3H), 7.45-7.33 (m, 4H), 7.13 (s, 1H), 5.18-5.09 (m, 2H), 2.41 (s, 3H); <sup>13</sup>C NMR (75 MHz, DMSO) δ 172.47, 160.89, 145.87, 145.40, 142.94, 135.11, 134.80, 131.31, 131.03, 130.43, 130.25, 129.71, 128.96, 127.94, 126.51, 123.89, 121.33, 120.05, 97.26, 65.12, 21.20; HRMS (ESI): calcd. for C<sub>25</sub>H<sub>19</sub>BrN<sub>2</sub>NaO<sub>6</sub>S [M+Na]<sup>+</sup> 577.0039, found 577.0041.

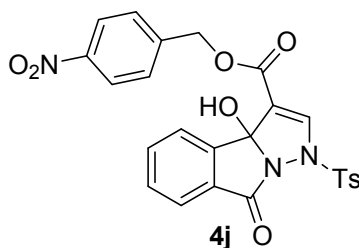

Yellow solid; m.p. 149-151 °C ; <sup>1</sup>H NMR (300 MHz, DMSO) δ 8.26-7.75 (m, 8H), 7.70-7.46 (m, 5H), 7.18 (s, 1H), 5.34 (s, 2H), 2.44 (s, 3H); <sup>13</sup>C NMR (75 MHz, DMSO) δ 172.48, 160.81, 147.14, 145.86, 145.43, 143.47, 143.22, 134.89, 131.04, 130.46, 129.73, 128.98, 128.62, 127.95, 126.47, 123.92, 123.47, 119.79, 97.28, 64.64, 21.19; HRMS (ESI): calcd. for C<sub>25</sub>H<sub>19</sub>N<sub>3</sub>NaO<sub>8</sub>S [M+Na]<sup>+</sup> 544.0785, found 544.0785.

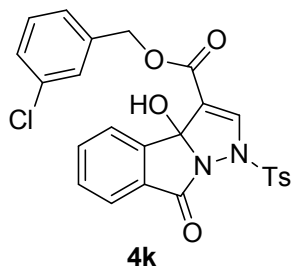

White solid; m.p. 118-120 °C; <sup>1</sup>H NMR (500 MHz, DMSO) δ 7.92 (s, 1H), 7.84 – 7.70 (m, 5H), 7.62 (t, *J* = 7.4 Hz, 1H), 7.51 – 7.32 (m, 6H), 7.16 (s, 1H), 5.19 (q, *J* = 12.8 Hz, 2H), 2.43 (s, 3H); <sup>13</sup>C NMR (125 MHz, DMSO) δ 172.9, 161.4, 146.4, 145.9, 143.6, 138.7, 135.2, 133.5, 131.6, 130.9, 130.8, 130.2, 129.4, 128.5, 128.2, 127.0, 124.4, 120.5, 97.8, 65.5, 21.7; HRMS (ESI): calcd. for C<sub>25</sub>H<sub>19</sub>ClN<sub>2</sub>NaO<sub>6</sub>S [M+Na]<sup>+</sup> 533.0545, found 533.0546.

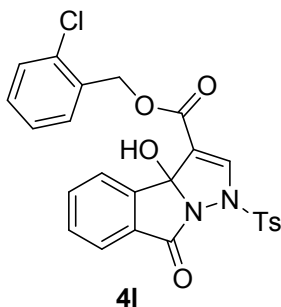

White solid; m.p. 87-89 °C; <sup>1</sup>H NMR (500 MHz, DMSO) δ 7.87 (s, 1H), 7.82–7.80 (m, 3H), 7.72 (d, *J* = 7.6 Hz, 1H), 7.68 (dd, *J* = 10.7, 4.2 Hz, 1H), 7.62–7.60 (m, 1H), 7.56–7.52 (m, 2H), 7.48–7.37 (m, 4H), 7.17 (s, 1H), 5.31 (d, *J* = 13.0 Hz, 1H), 5.23 (d, *J* = 13.0 Hz, 1H), 2.44 (s, 3H); <sup>13</sup>C NMR (125 MHz, DMSO) δ 172.9, 161.3, 146.3, 145.9, 143.5, 135.2, 133.5, 133.1, 131.5, 130.9, 130.8, 130.6, 130.2, 129.8, 129.4, 128.4, 127.8, 126.9, 124.4, 120.4, 97.8, 63.7, 21.7; HRMS (ESI): calcd. for C<sub>25</sub>H<sub>19</sub>ClN<sub>2</sub>NaO<sub>6</sub>S [M+Na]<sup>+</sup> 533.0545, found 533.0557.

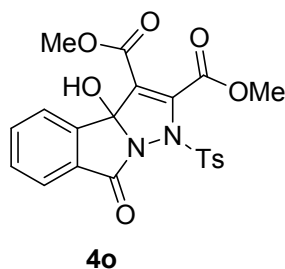

White solid; m.p. 123-126 °C; <sup>1</sup>H NMR (300 MHz, DMSO) δ 7.83-7.78 (m, 5H), 7.67-7.45 (m, 3H), 7.34 (s, 1H), 3.93 (s, 3H), 3.67 (s, 3H), 2.42 (s, 3H); <sup>13</sup>C NMR (75 MHz, DMSO) δ 171.90, 160.56, 159.52, 145.93, 144.96, 144.35, 135.33, 130.83, 130.27, 129.79, 129.45, 127.96, 126.40, 124.13, 119.50, 97.25, 53.66, 52.33, 21.27; HRMS (ESI): calcd. for C<sub>21</sub>H<sub>22</sub>N<sub>3</sub>O<sub>8</sub>S [M+NH<sub>4</sub>]<sup>+</sup> 476.1122, found 476.1124.

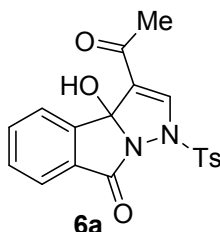

White solid; m.p. 118-121 °C; <sup>1</sup>H NMR (300 MHz, DMSO) δ 8.16 (s, 1H), 7.92-7.72 (m, 5H), 7.60-7.41 (m, 3H), 6.85 (s, 1H), 2.40 (s, 3H), 2.26 (s, 3H); <sup>13</sup>C NMR (75 MHz, DMSO) δ 191.89, 172.57, 146.31, 145.27, 144.09, 134.70, 131.08, 130.18, 129.68, 128.95, 128.03, 127.00, 123.60, 97.71, 27.48, 21.20; HRMS (ESI): calcd. for C<sub>19</sub>H<sub>16</sub>N<sub>2</sub>NaO<sub>5</sub>S [M+Na]<sup>+</sup> 407.0672, found 407.0679.

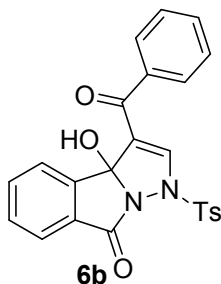

White solid; m.p. 190-192 °C ;  $^1\text{H}$  NMR (300 MHz, DMSO)  $\delta$  7.93-7.76 (m, 5H), 7.65-7.44 (m, 9H), 7.11 (s, 1H), 2.42 (s, 3H);  $^{13}\text{C}$  NMR (75 MHz, DMSO)  $\delta$  188.33, 172.42, 146.18, 145.48, 143.74, 138.14, 134.80, 132.56, 131.15, 130.34, 129.75, 129.05, 128.67, 128.44, 128.12, 126.77, 125.95, 123.79, 98.31, 21.21; HRMS (ESI): calcd. for  $\text{C}_{24}\text{H}_{18}\text{N}_2\text{NaO}_5\text{S}$   $[\text{M}+\text{Na}]^+$  469.0829, found 469.0827.

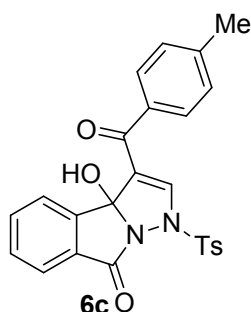

White solid; m.p. 177-180 °C ;  $^1\text{H}$  NMR (300 MHz, DMSO)  $\delta$  7.91-7.76 (m, 5H), 7.62-7.31 (m, 8H), 7.08 (s, 1H), 2.42 (s, 3H), 2.38 (s, 3H);  $^{13}\text{C}$  NMR (75 MHz, DMSO)  $\delta$  187.89, 172.42, 146.21, 145.44, 143.16, 142.94, 135.54, 134.75, 131.17, 130.30, 129.71, 129.18, 129.03, 128.59, 128.10, 126.73, 126.02, 123.76, 98.30, 21.19, 21.03; HRMS (ESI): calcd. for  $\text{C}_{25}\text{H}_{20}\text{N}_2\text{NaO}_5\text{S}$   $[\text{M}+\text{Na}]^+$  483.0985, found 483.0988.

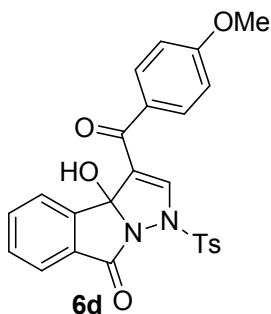

White solid; m.p. 165-168 °C ;  $^1\text{H}$  NMR (300 MHz, DMSO)  $\delta$  7.90-7.75 (m, 5H), 7.61-7.46 (m, 6H), 7.04 (s, 2H), 7.02 (s, 1H), 3.84 (s, 3H), 2.42 (s, 3H);  $^{13}\text{C}$  NMR (75 MHz, DMSO)  $\delta$  186.71, 172.44, 162.89, 146.27, 145.38, 142.18, 135.26, 134.71, 130.85, 130.26, 129.69, 129.05, 128.08, 127.37, 126.67, 126.05, 123.73, 113.91, 98.32, 55.49, 21.18. HRMS (ESI): calcd. for  $\text{C}_{25}\text{H}_{20}\text{N}_2\text{NaO}_6\text{S}$   $[\text{M}+\text{Na}]^+$  499.0934, found 499.0939.

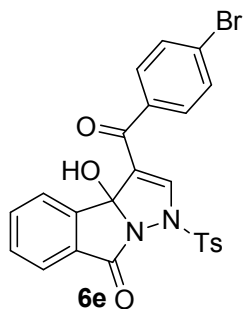

White solid; m.p. 168-170 °C ;  $^1\text{H}$  NMR (300 MHz, DMSO)  $\delta$  7.92-7.70(m, 8H), 7.63-7.44 (m, 5H), 7.10 (s, 1H), 2.41 (s, 3H);  $^{13}\text{C}$  NMR (75 MHz, DMSO)  $\delta$  187.43, 172.36, 146.09, 145.49, 144.44, 137.17, 134.81, 131.69, 131.17, 130.47, 130.35, 129.76, 129.02, 128.14, 126.71, 126.43, 125.69, 123.80, 98.23, 21.22; HRMS (ESI): calcd. for  $\text{C}_{24}\text{H}_{17}\text{BrN}_2\text{NaO}_5\text{S}$   $[\text{M}+\text{Na}]^+$  546.9934, found 546.9941.

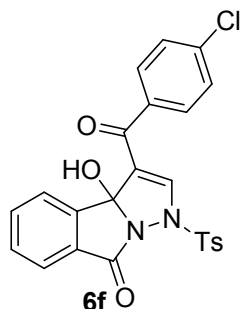

White solid; m.p. 232-235 °C ;  $^1\text{H}$  NMR (300 MHz, DMSO)  $\delta$  7.92-7.69 (m, 6H), 7.63-7.44 (m, 7H), 7.10 (s, 1H), 2.41 (s, 3H);  $^{13}\text{C}$  NMR (75 MHz, DMSO)  $\delta$  187.25, 172.36, 146.09, 145.49, 144.36, 137.37, 136.83, 134.80, 131.17, 130.35, 129.75, 129.02, 128.74, 128.14, 126.70, 125.71, 123.80, 114.10, 98.24, 21.21; HRMS (ESI): calcd. for  $\text{C}_{24}\text{H}_{17}\text{ClN}_2\text{NaO}_5\text{S}$   $[\text{M}+\text{Na}]^+$  503.0439, found 503.0449.

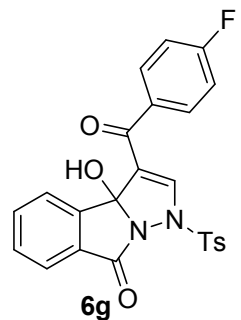

White solid; m.p. 207-210 °C ;  $^1\text{H}$  NMR (300 MHz, DMSO)  $\delta$  7.90-7.75 (m, 5H), 7.71-7.58 (m, 4H), 7.47-7.30 (m, 4H), 7.09 (s, 1H), 2.42 (s, 3H);  $^{13}\text{C}$  NMR (75 MHz, DMSO)  $\delta$  186.95, 172.37, 166.26 ( $J_{\text{CF}} = 249\text{Hz}$ ), 146.13, 145.48, 143.87, 134.78, 134.73, 131.44 ( $J_{\text{CF}} = 9.75\text{Hz}$ ), 131.17, 130.33, 129.74, 129.03, 128.13, 126.68, 125.81, 123.79, 115.82 ( $J_{\text{CF}} = 22.5\text{Hz}$ ), 98.26, 21.21; HRMS (ESI): calcd. for  $\text{C}_{24}\text{H}_{17}\text{FN}_2\text{NaO}_5\text{S}$   $[\text{M}+\text{Na}]^+$  487.0734, found 487.0750.



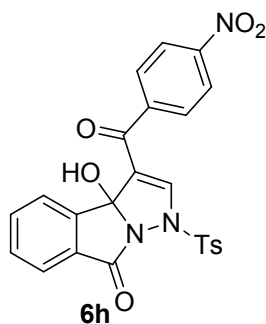

Yellow solid; m.p. 167-171 °C ;  $^1\text{H}$  NMR (300 MHz, DMSO)  $\delta$  7.92-7.69 (m, 8H), 7.63-7.44 (m, 5H), 7.09 (s, 1H), 2.41 (s, 3H);  $^{13}\text{C}$  NMR (75 MHz, DMSO)  $\delta$  187.39, 172.31, 146.06, 145.45, 144.34, 137.15, 134.75, 131.64, 131.18, 130.41, 130.30, 129.71, 128.98, 128.10, 126.67, 126.37, 125.66, 123.75, 98.19, 21.17; HRMS (ESI): calcd. for  $\text{C}_{24}\text{H}_{17}\text{N}_3\text{NaO}_7\text{S}$   $[\text{M}+\text{Na}]^+$  514.0679, found 514.0687.

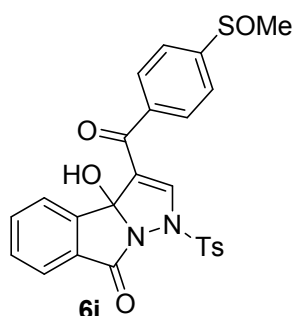

White solid; m.p. 97-101 °C ;  $^1\text{H}$  NMR (300 MHz, DMSO)  $\delta$  7.96-7.76 (m, 9H), 7.72-7.44 (m, 4H), 7.13 (s, 1H), 2.81 (s, 3H), 2.41 (s, 3H);  $^{13}\text{C}$  NMR (75 MHz, DMSO)  $\delta$  187.73, 172.39, 150.63, 146.10, 145.53, 144.74, 139.88, 134.84, 131.16, 130.38, 129.79, 129.18, 129.05, 128.17, 126.78, 125.82, 123.95, 123.84, 98.29, 42.96, 21.24; HRMS (ESI): calcd. for  $\text{C}_{25}\text{H}_{21}\text{N}_2\text{O}_6\text{S}_2$   $[\text{M}+\text{H}]^+$  509.0836, found 509.0840.

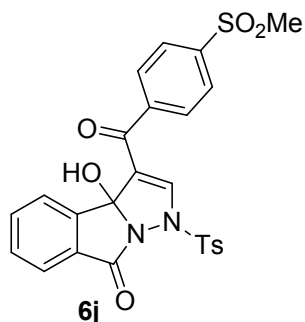

Yellow solid; m.p. 121-123 °C ;  $^1\text{H}$  NMR (300 MHz, DMSO)  $\delta$  8.06-7.79 (m, 9H), 7.74-7.46 (m, 5H), 7.14 (s, 1H), 3.28 (s, 3H), 2.42 (s, 3H);  $^{13}\text{C}$  NMR (75 MHz, DMSO)  $\delta$  188.10, 172.83, 146.52, 146.05, 144.04, 142.71, 135.35, 131.66, 130.89, 130.30, 129.70, 129.51, 128.66, 127.83, 127.28, 126.21, 124.32, 98.70, 43.75, 21.72; HRMS (ESI): calcd. for  $\text{C}_{25}\text{H}_{20}\text{N}_2\text{NaO}_7\text{S}_2$   $[\text{M}+\text{Na}]^+$  547.0604, found 547.0610.

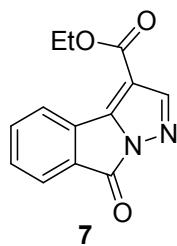

Yellow solid; m.p. 129-131 °C;  $^1\text{H}$  NMR (300 MHz, DMSO)  $\delta$  8.12 (s, 1H), 7.93-7.81 (m, 2H), 7.78-7.54 (m, 2H), 4.39 (q,  $J = 7.1$  Hz, 2H), 1.39 (t,  $J = 7.1$  Hz, 3H);  $^{13}\text{C}$  NMR (75 MHz, DMSO)  $\delta$  161.21, 159.53, 148.76, 148.02, 135.77, 131.36, 130.59, 130.06, 126.54, 124.13, 111.05, 60.97, 14.17; HRMS (ESI): calcd. for  $\text{C}_{13}\text{H}_{11}\text{N}_2\text{O}_3$   $[\text{M}+\text{H}]^+$  243.0764, found 243.0769.

Copies of  $^1\text{H}$ NMR and  $^{13}\text{C}$ NMR spectra:

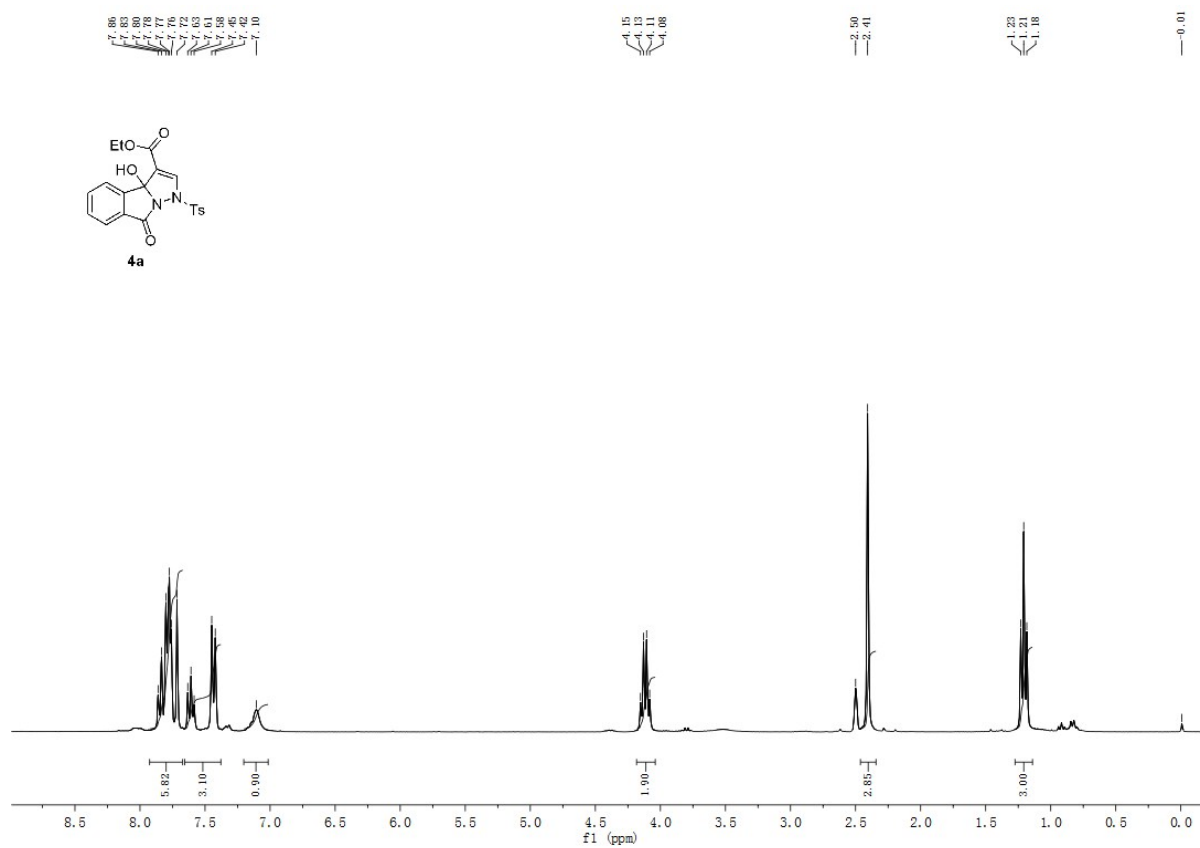

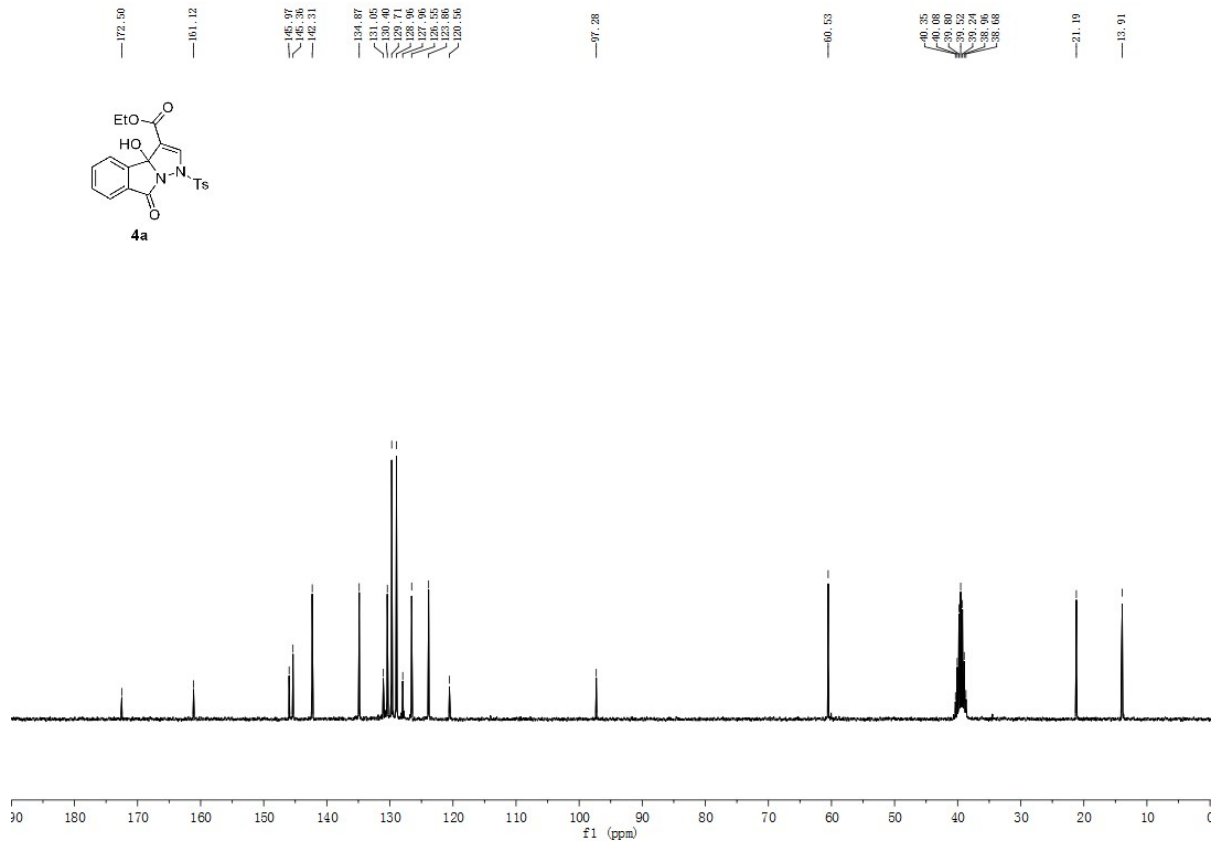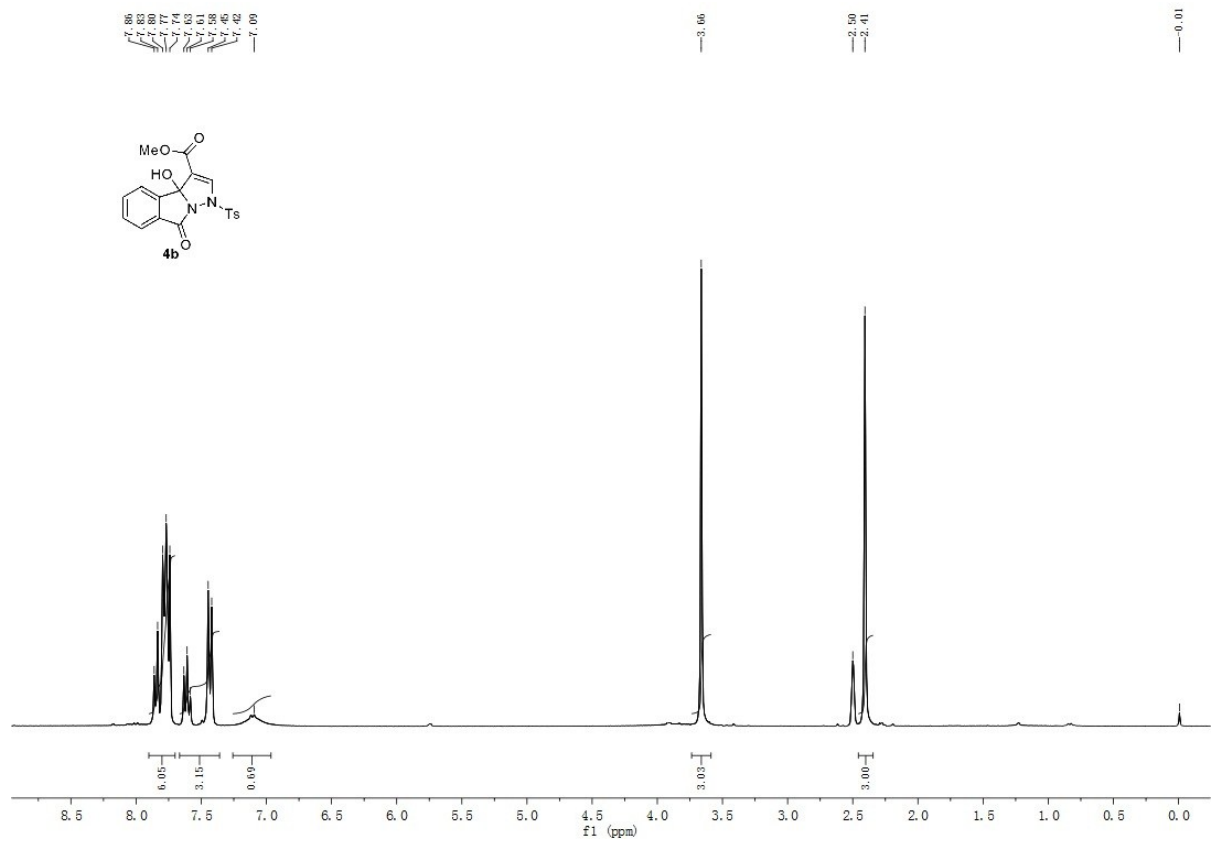

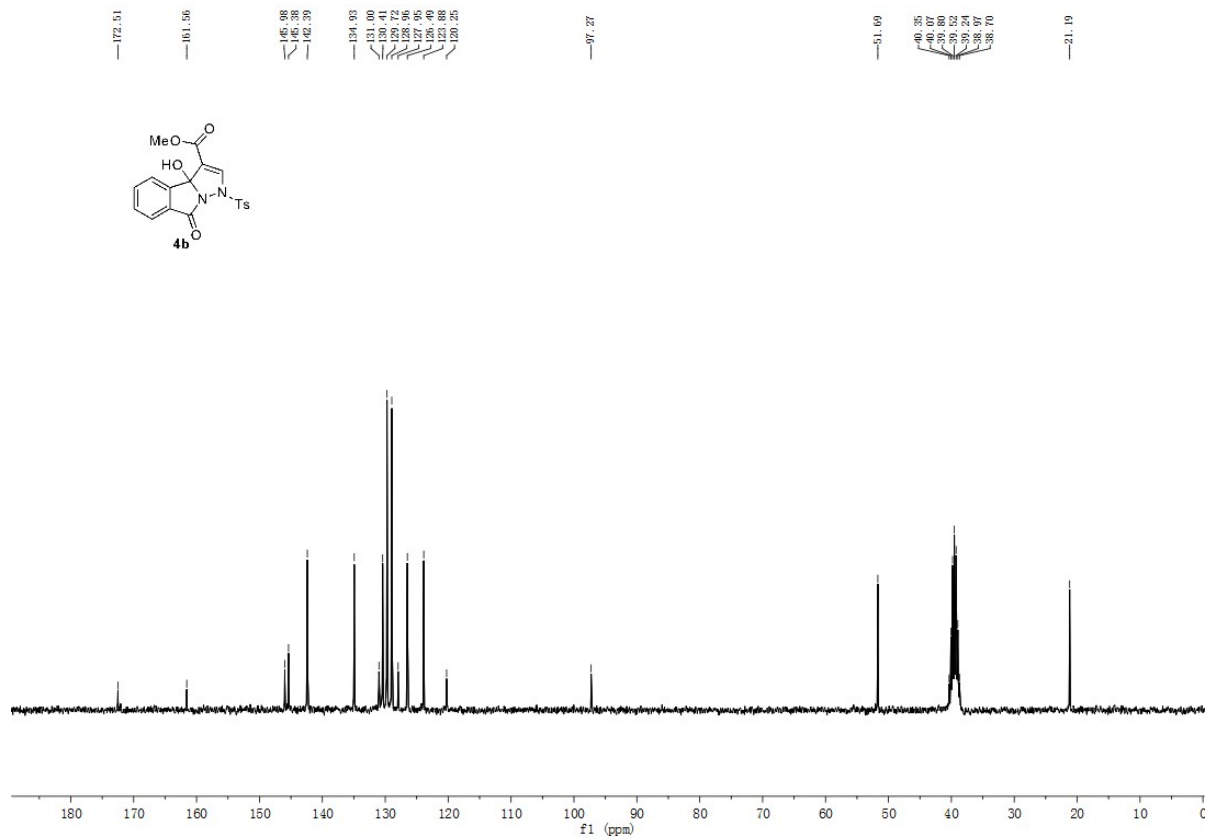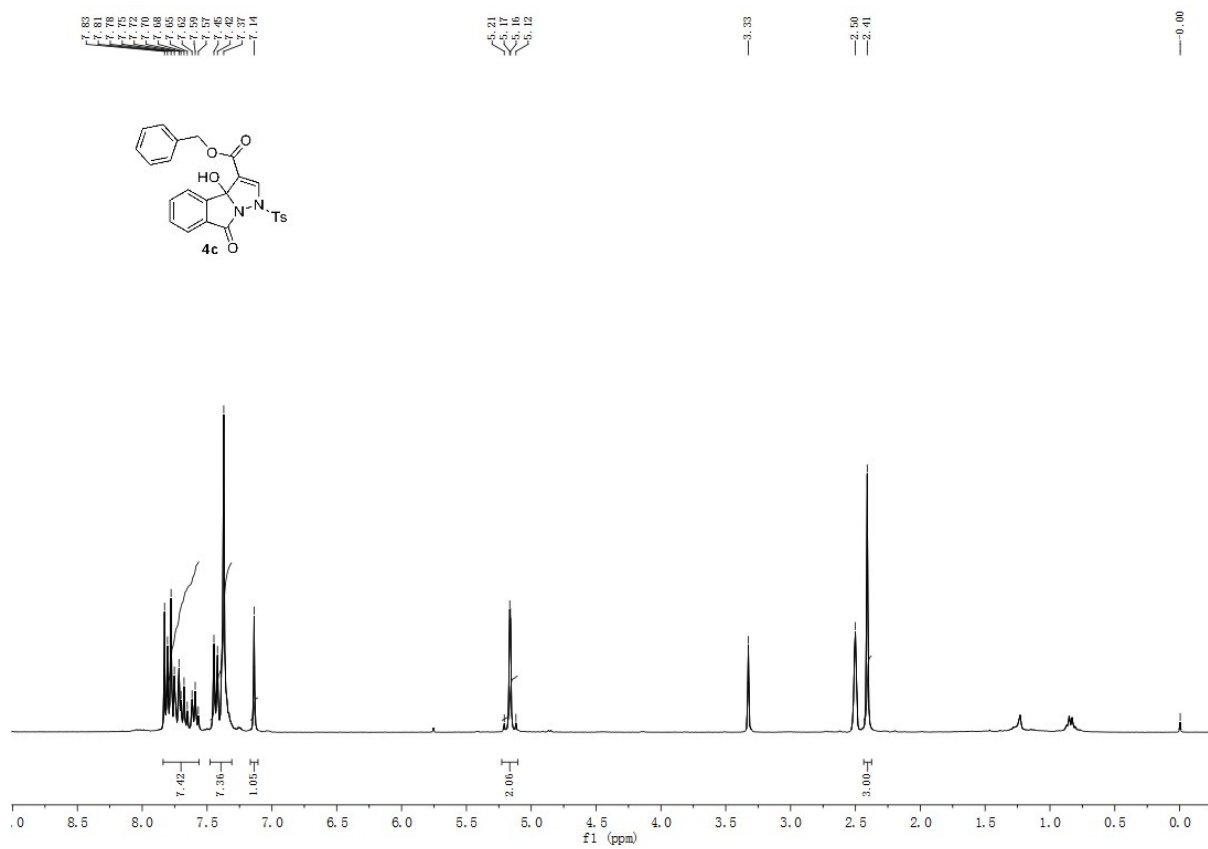

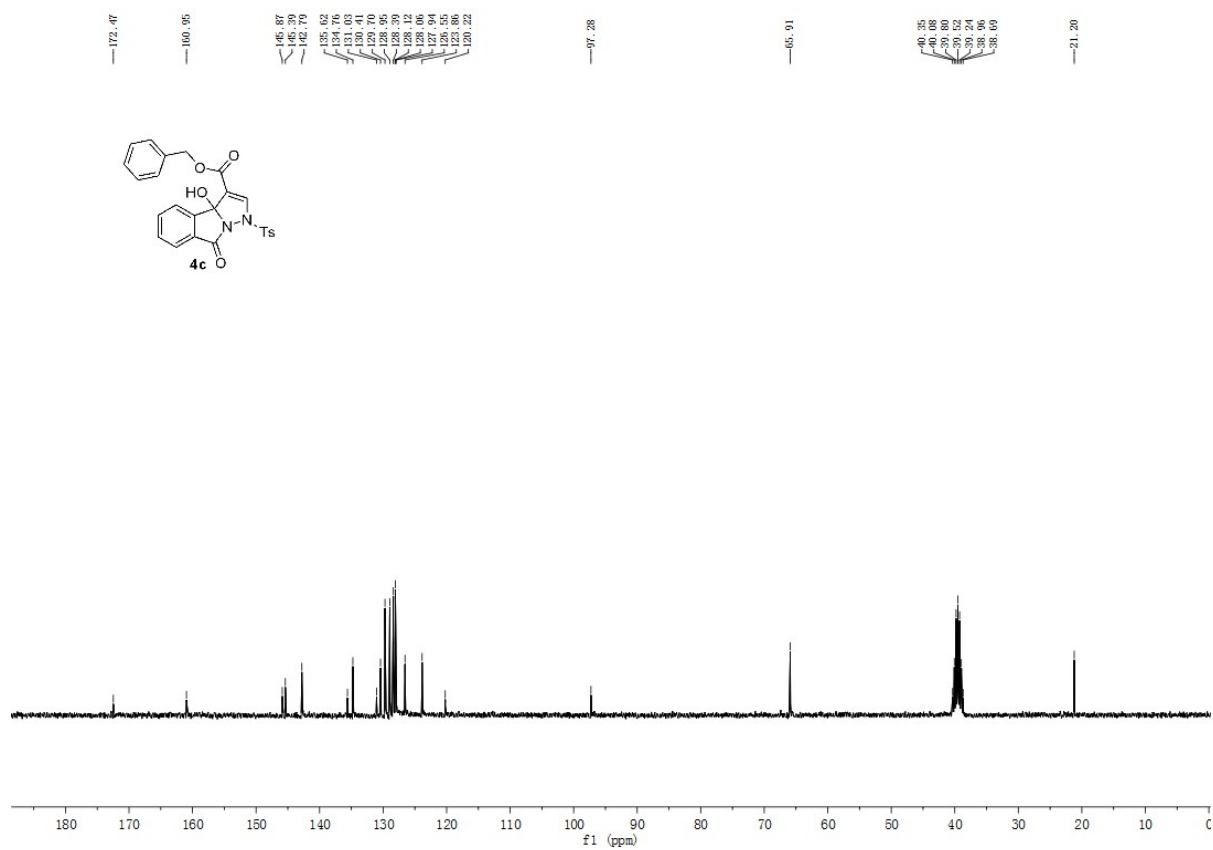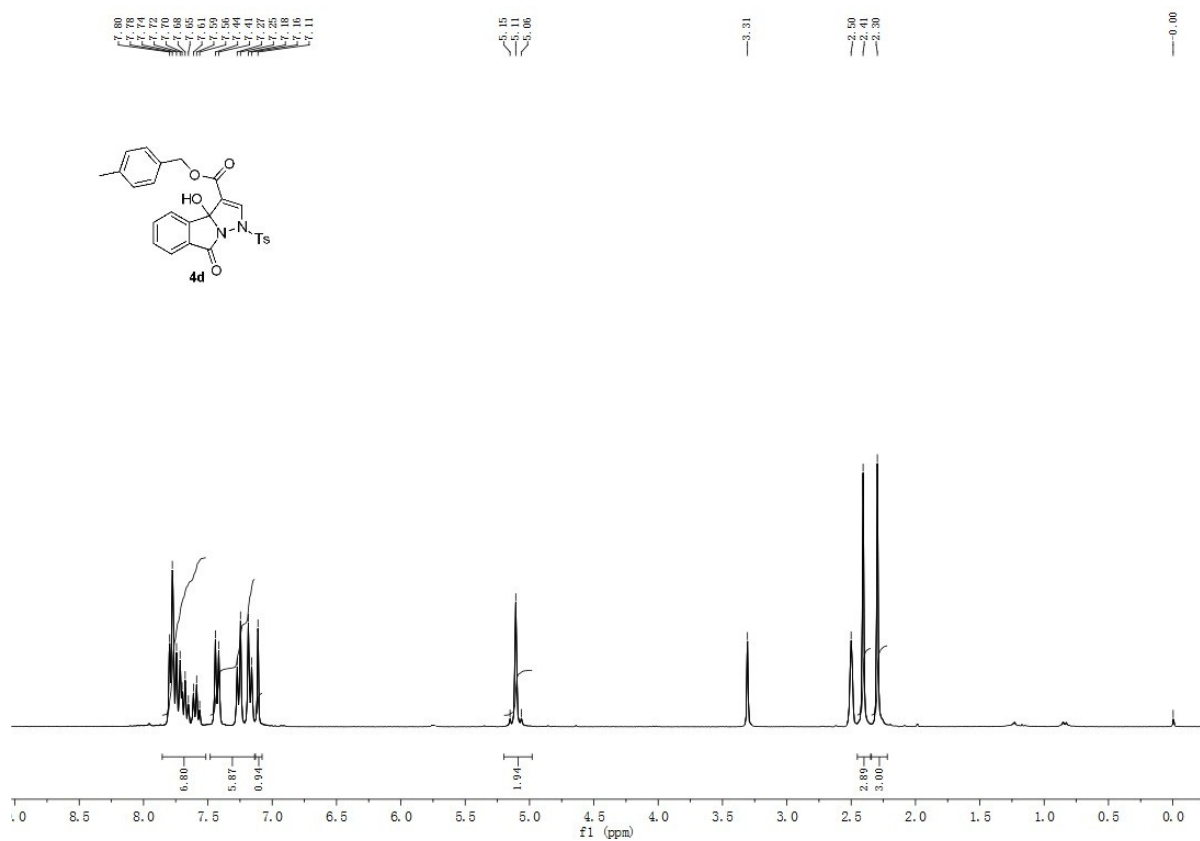

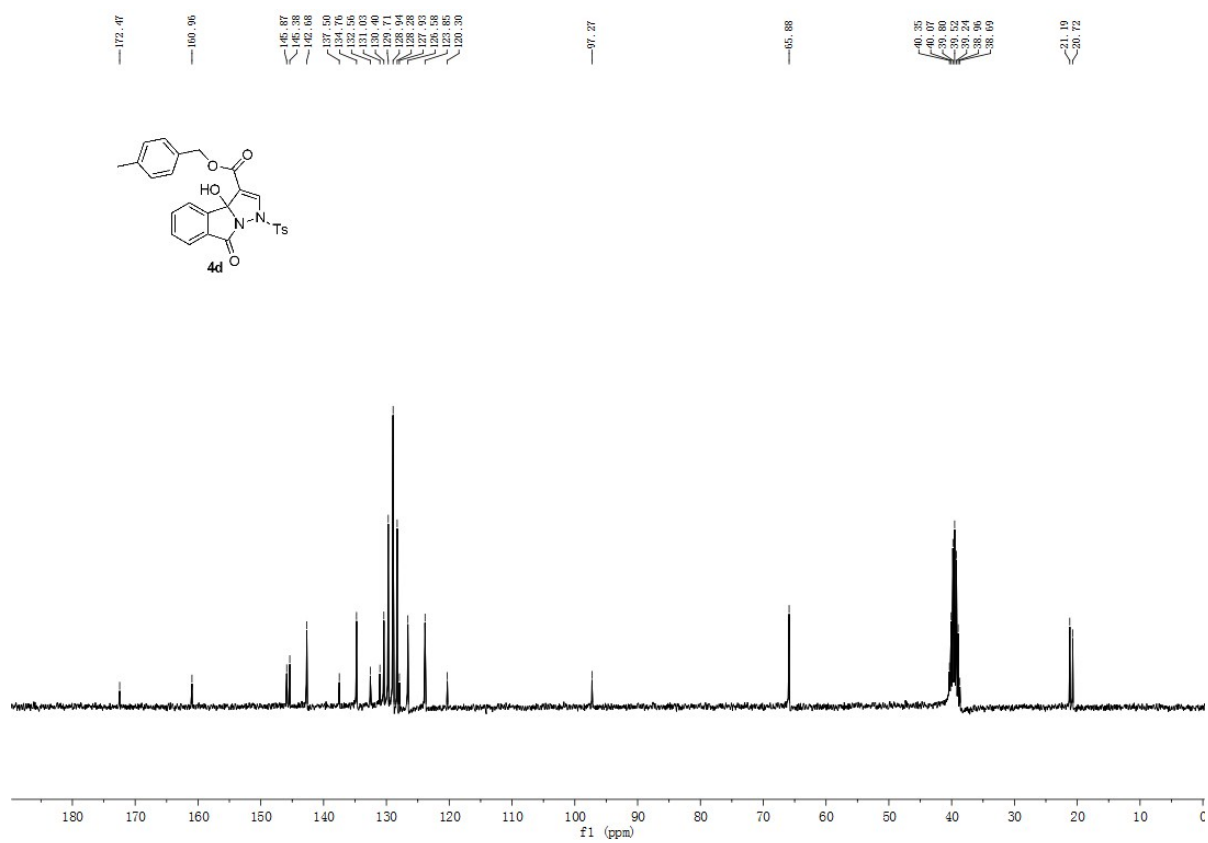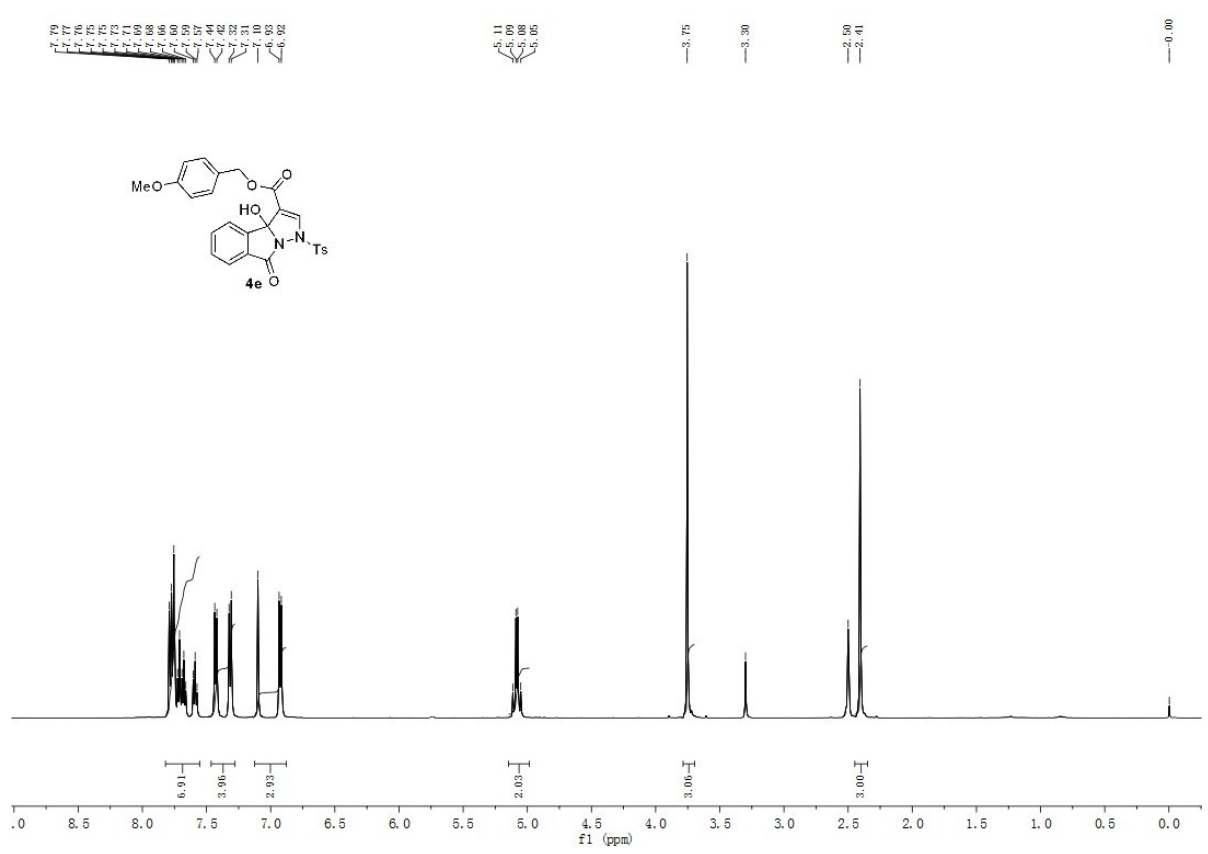

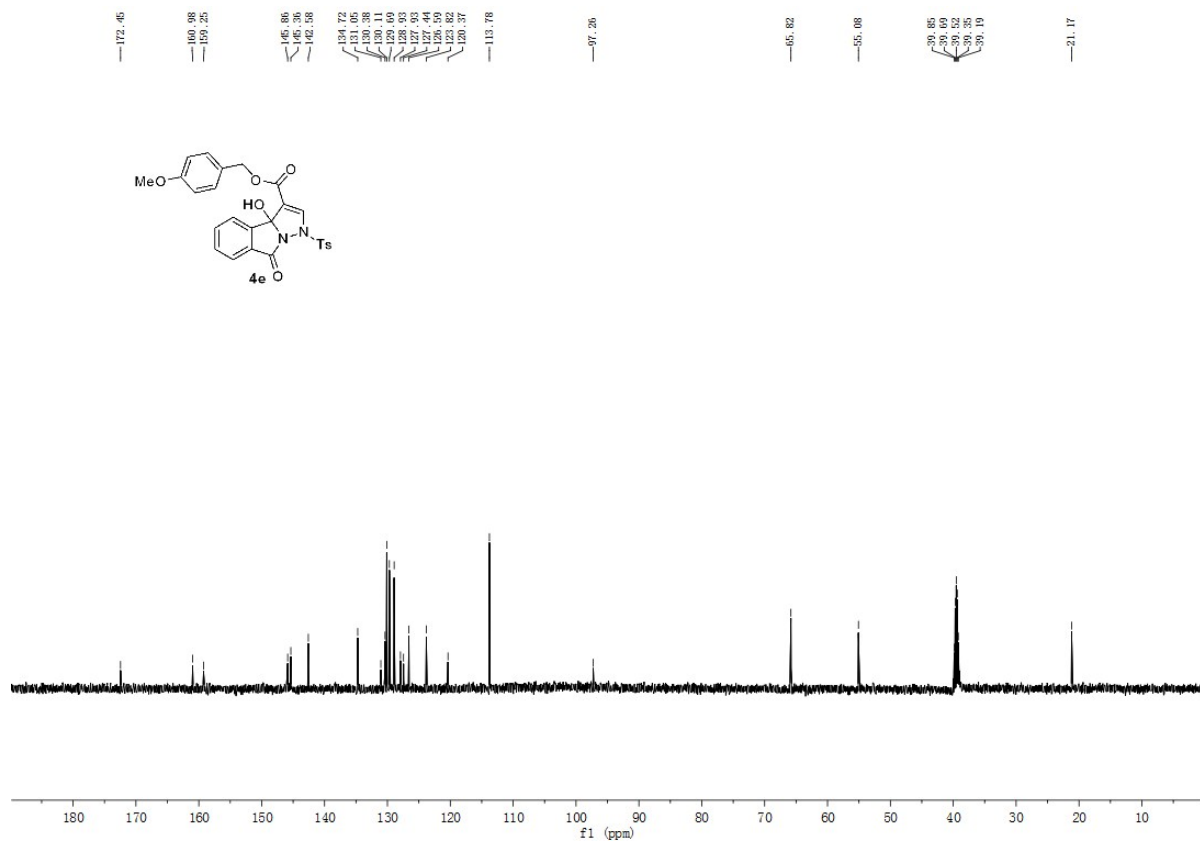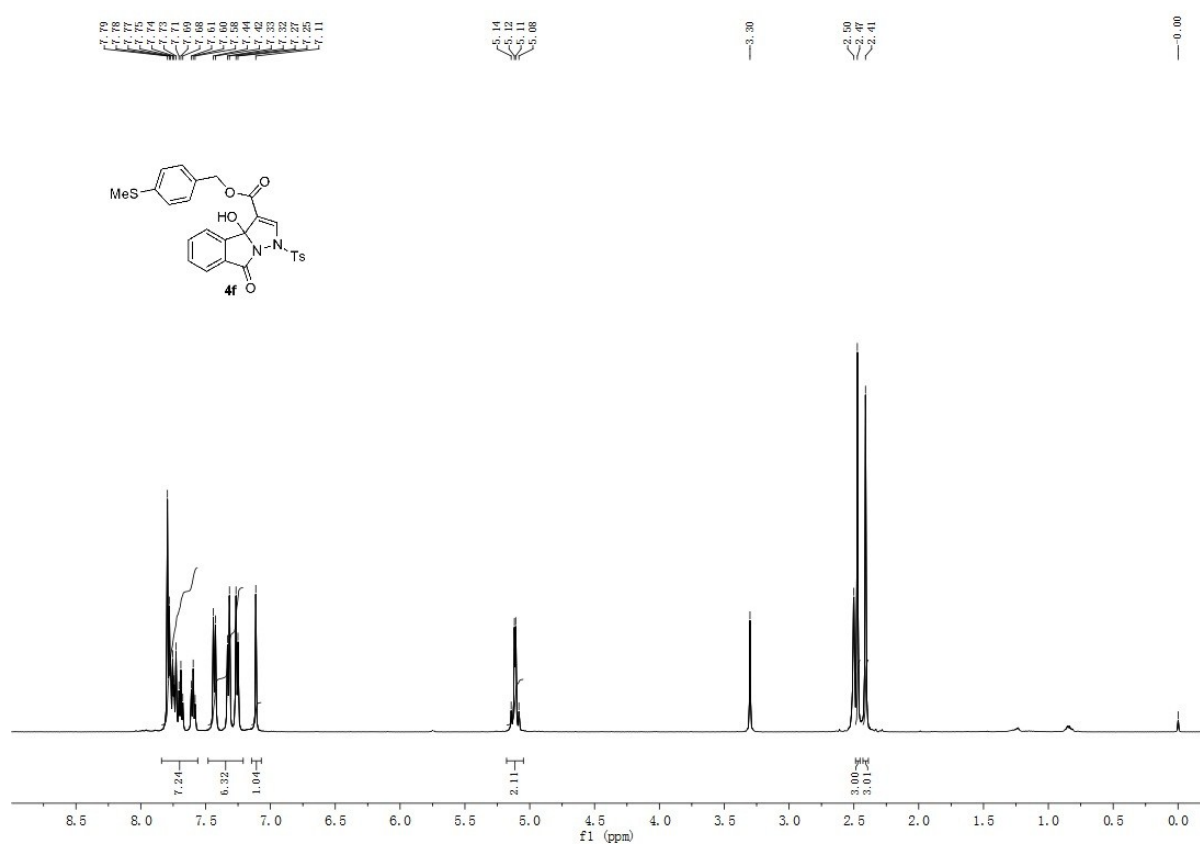



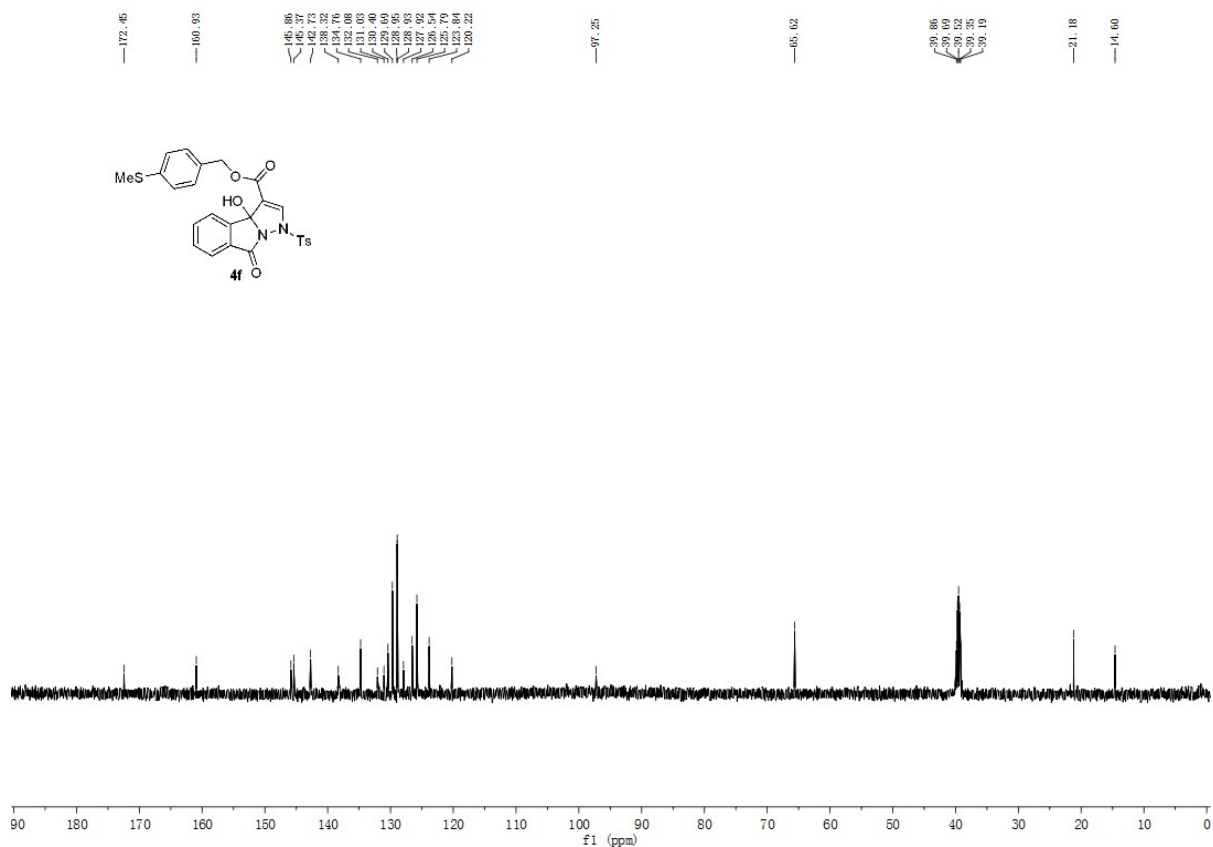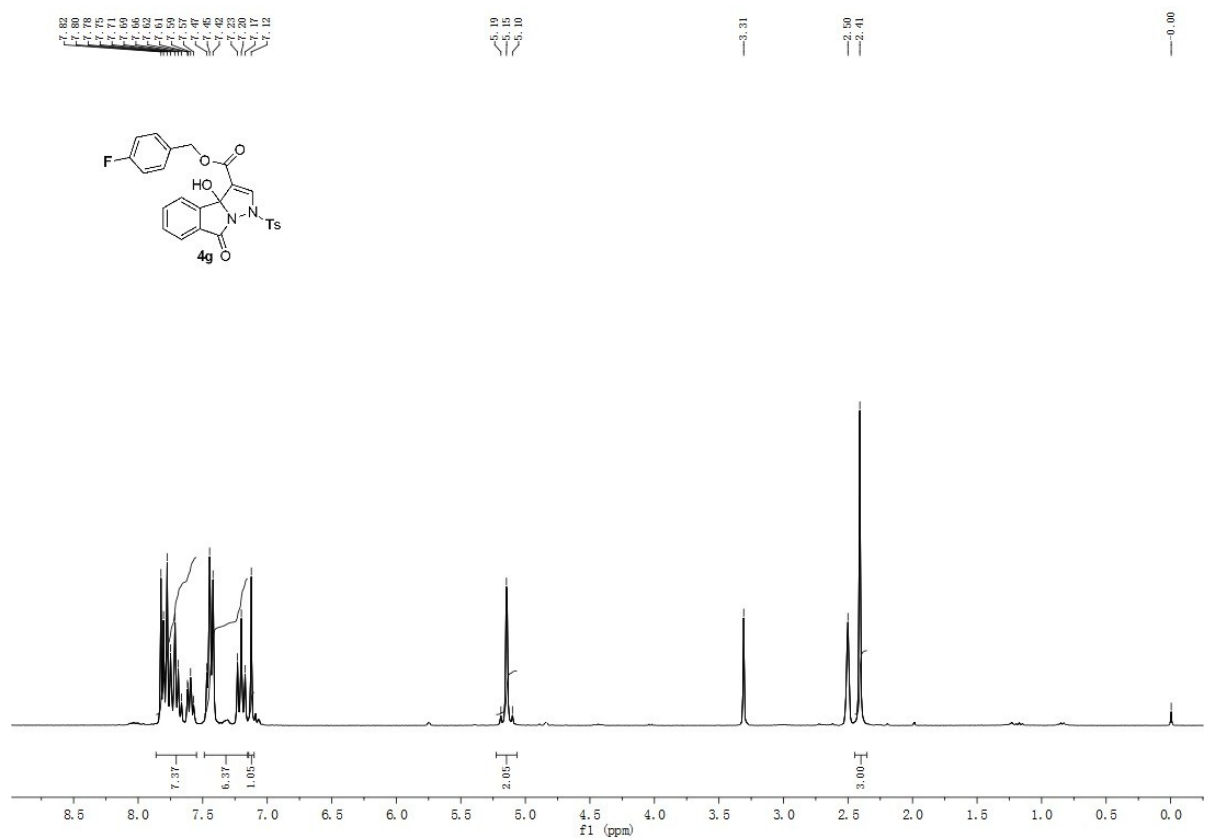

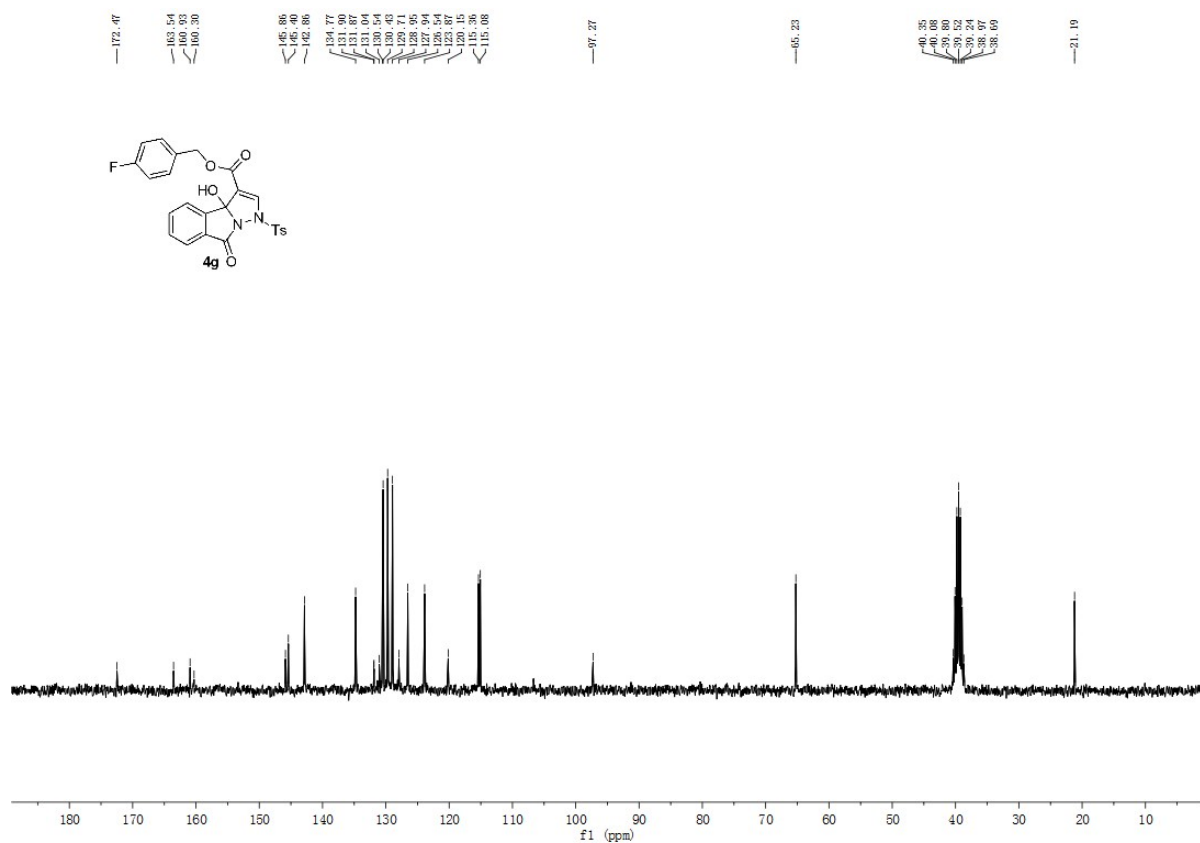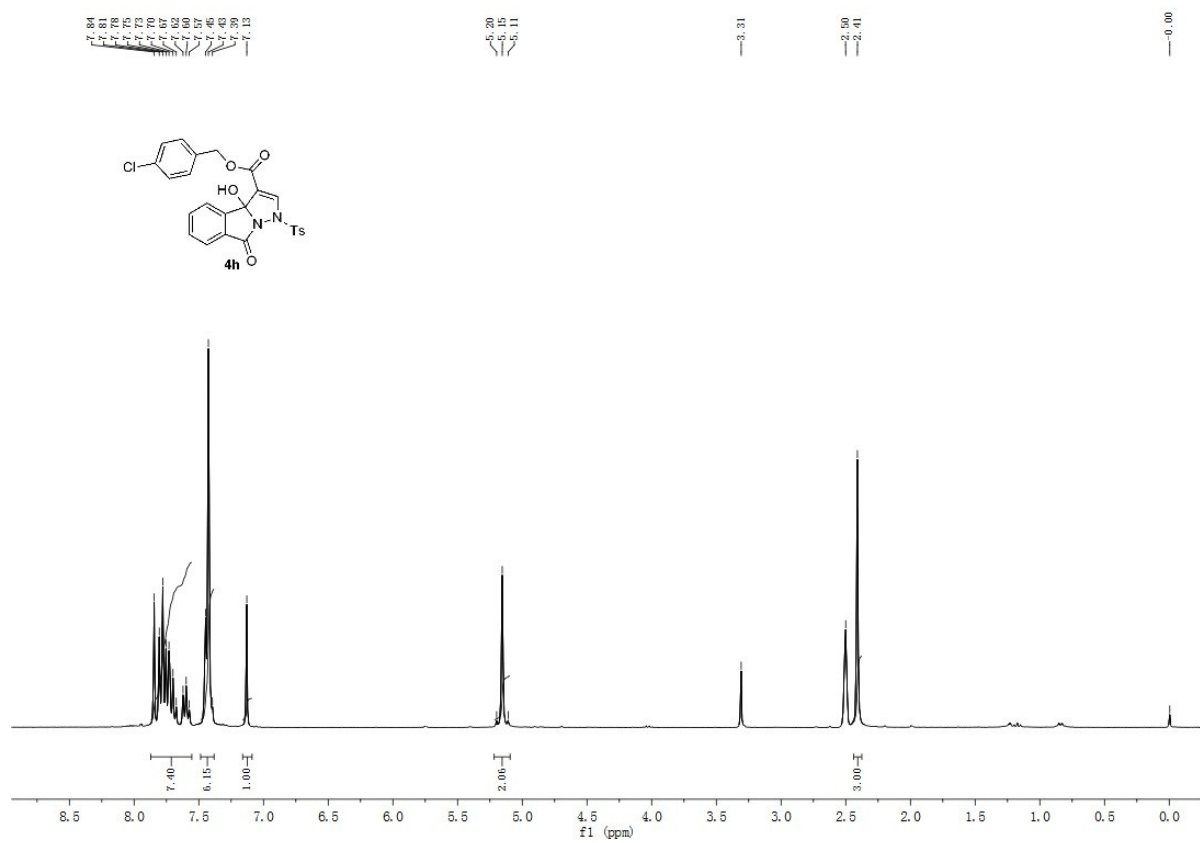

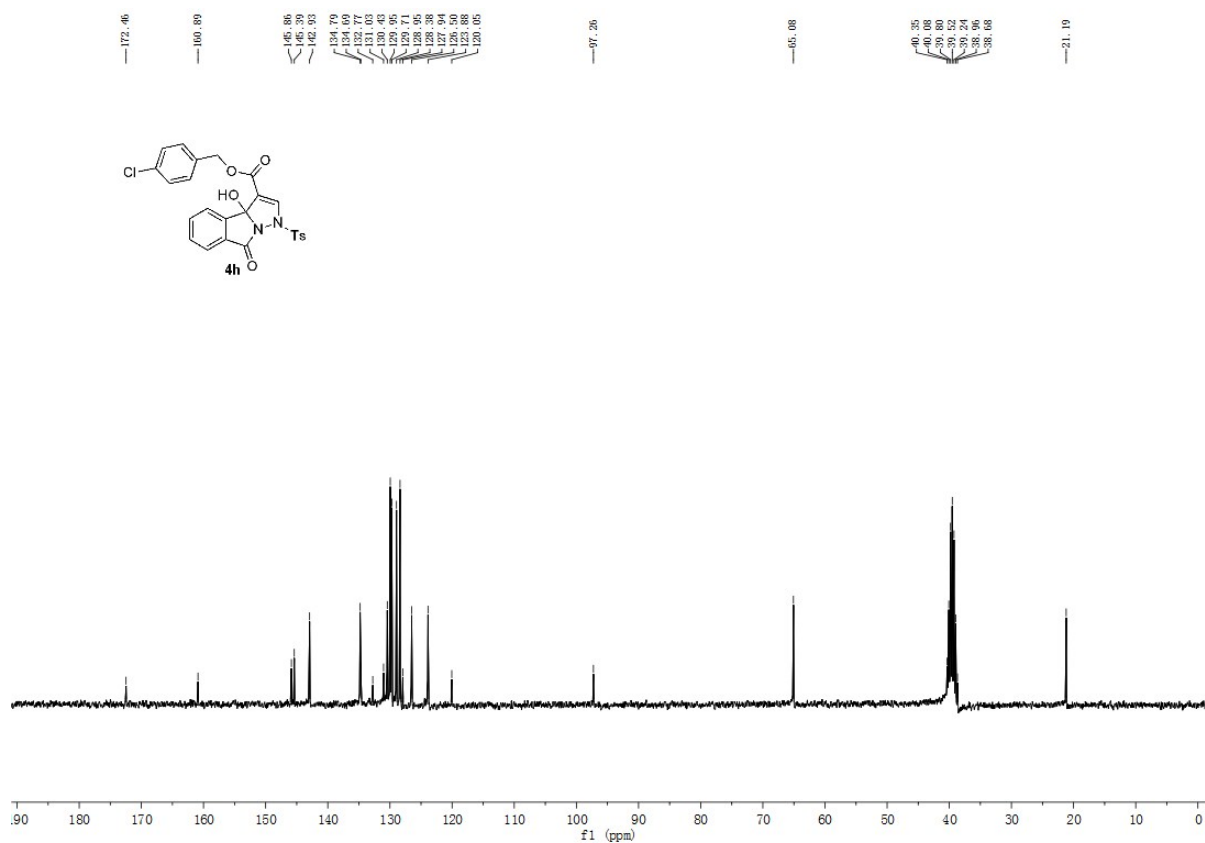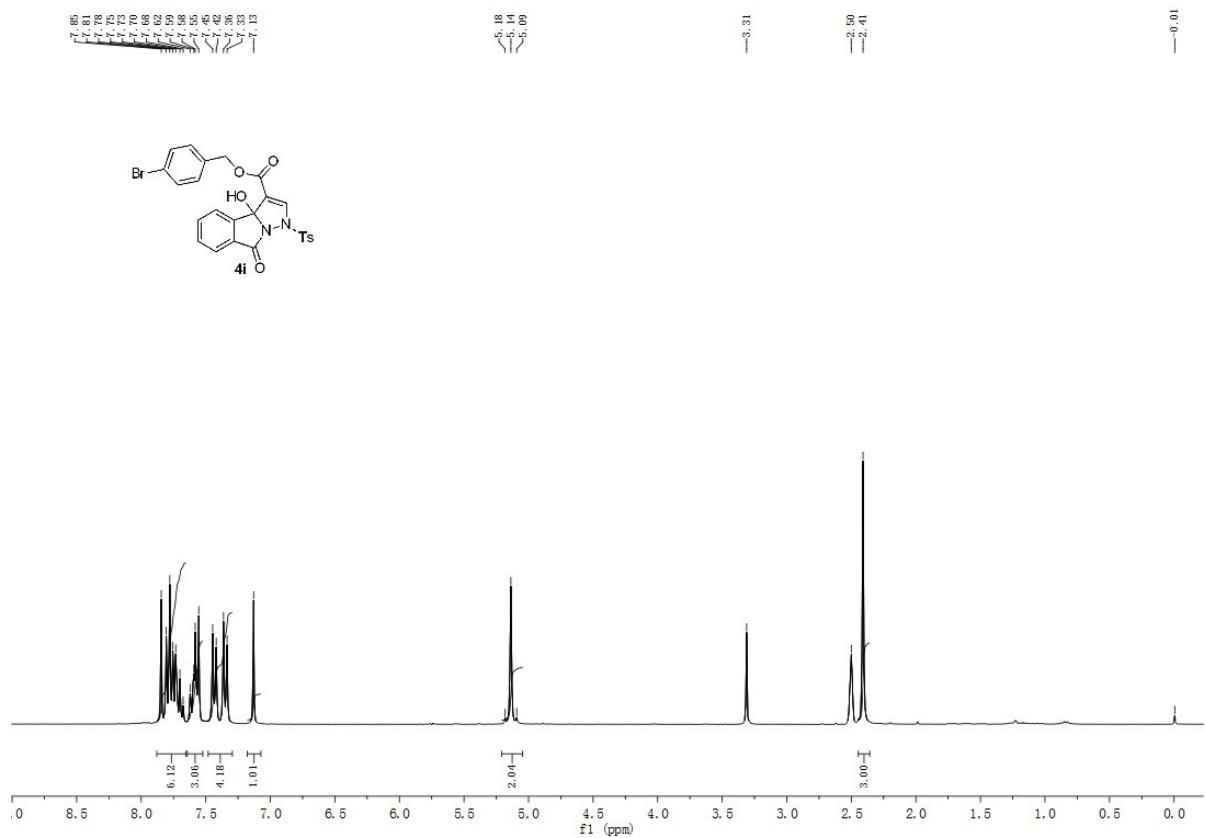

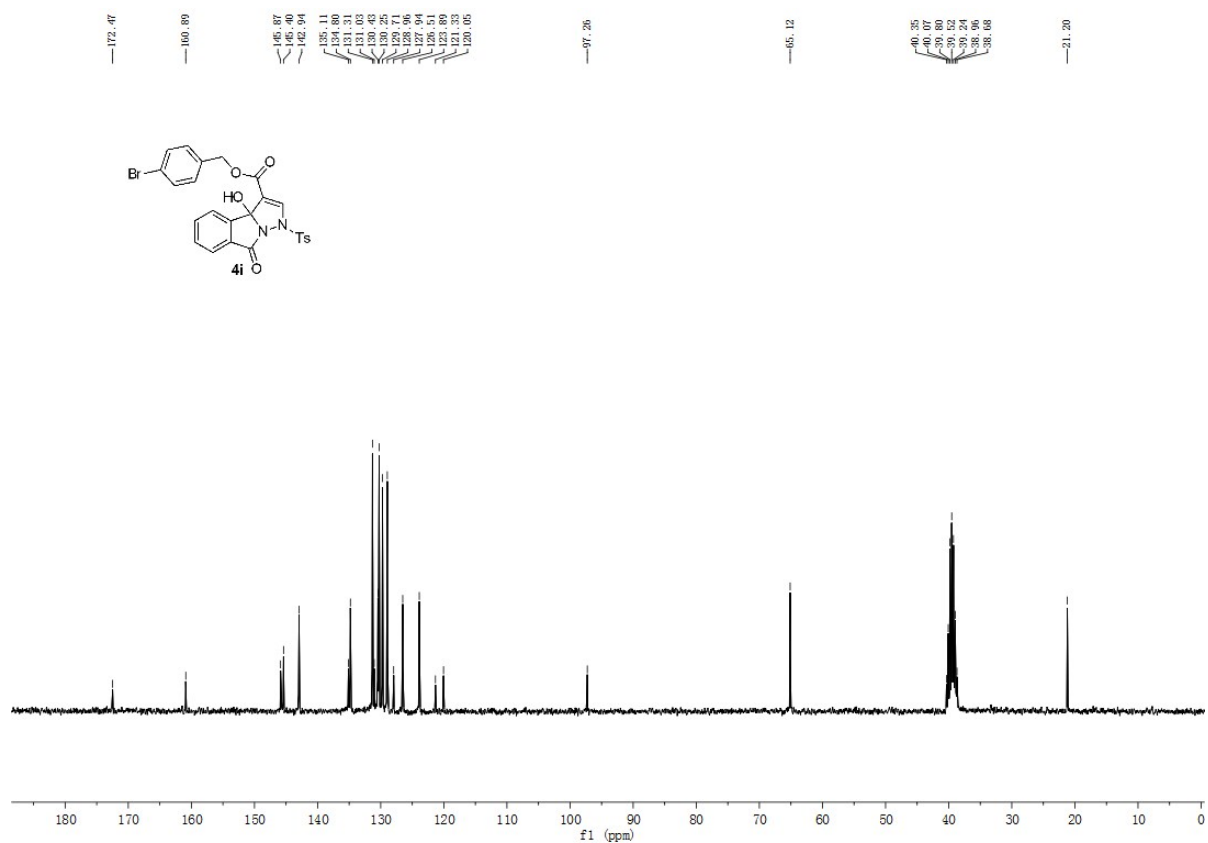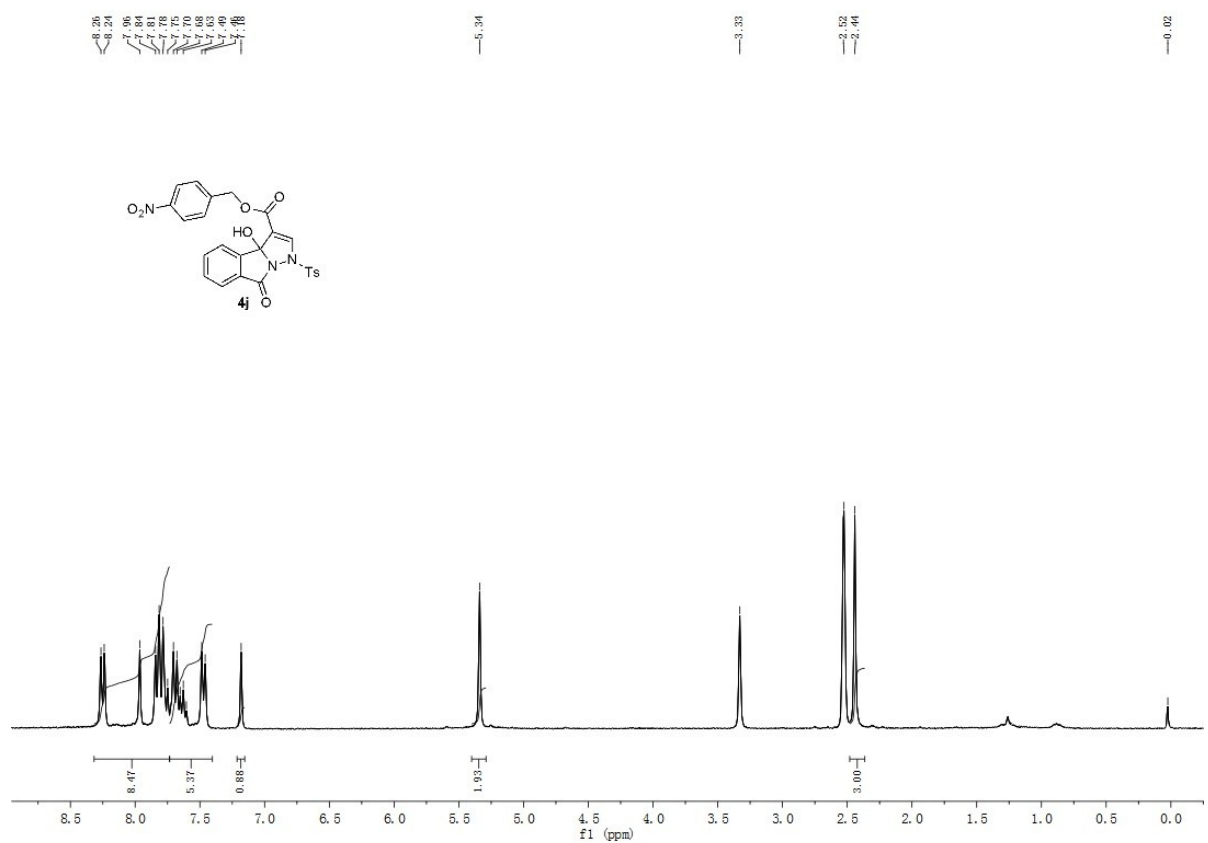

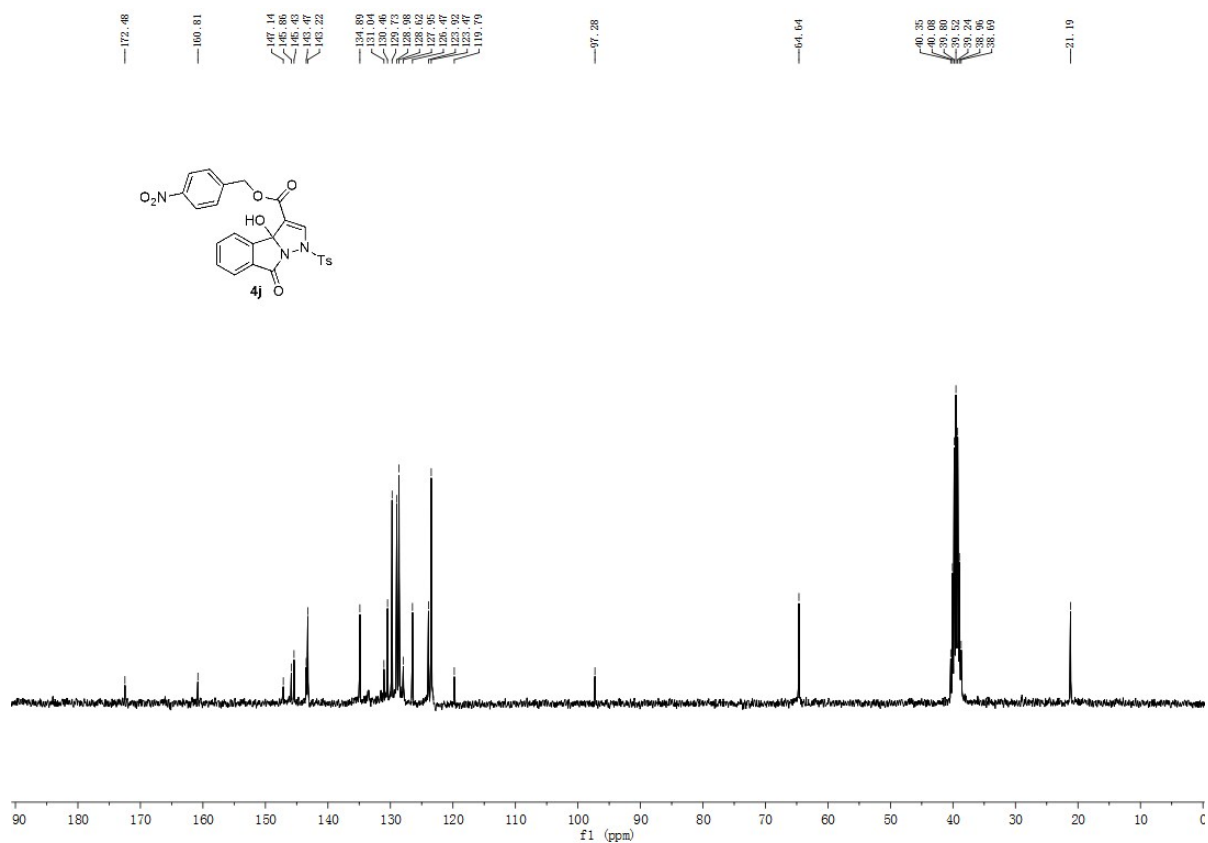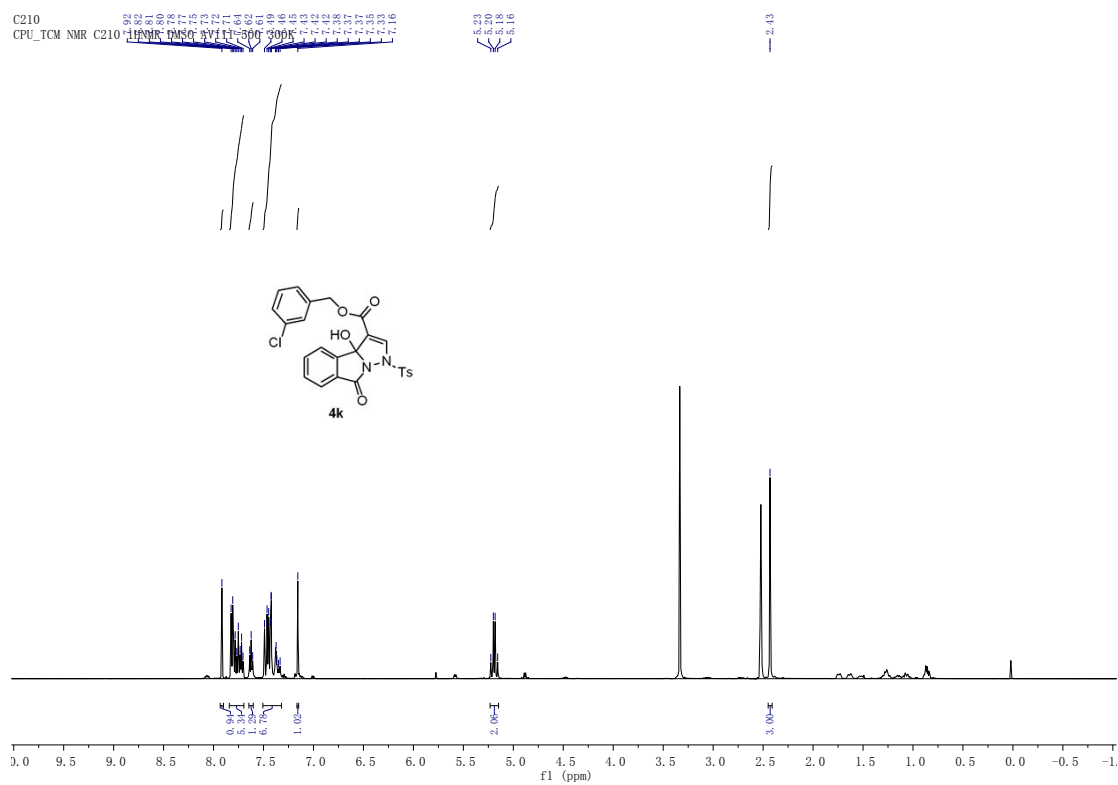



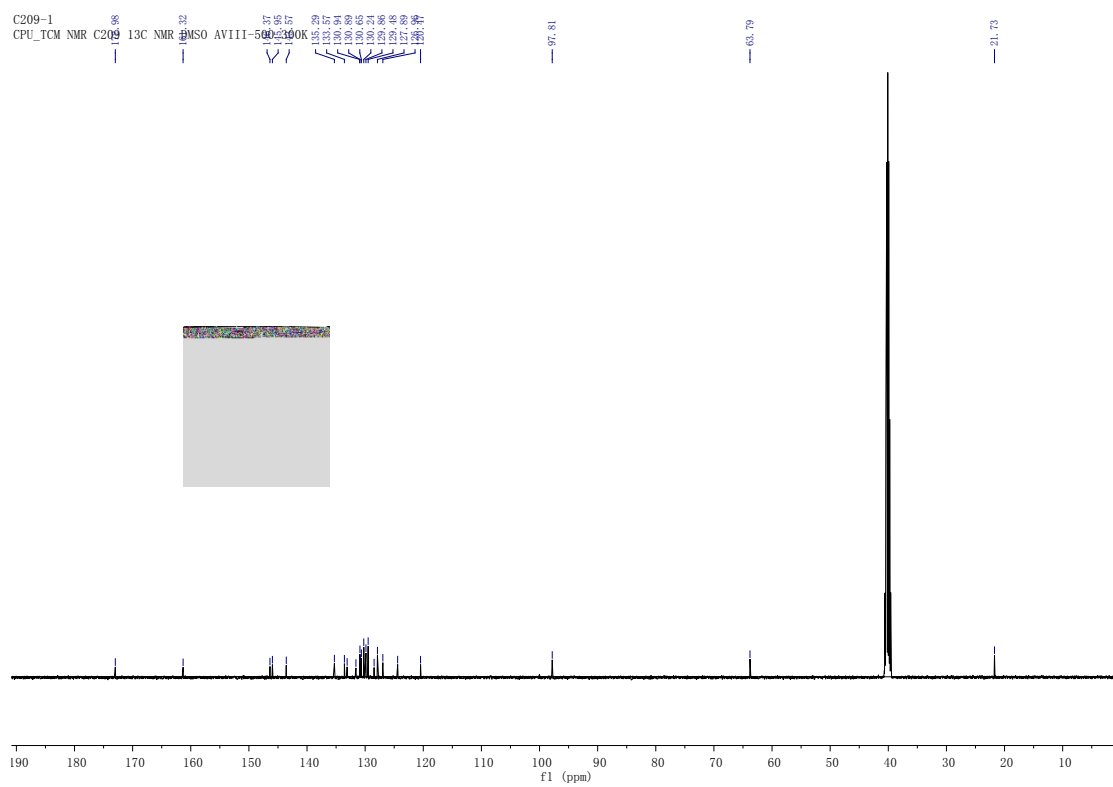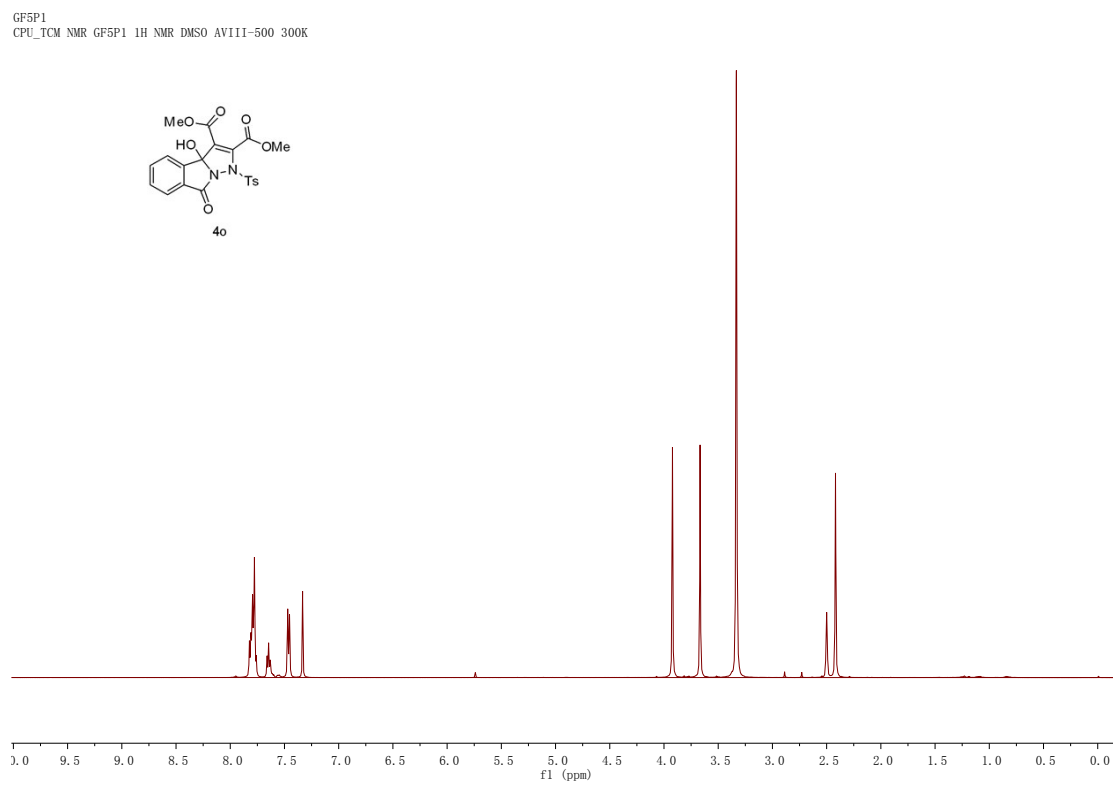

GF5P1  
 CPU\_TCM NMR GF5P1 13C NMR DMSO  $\delta$  VIII-509300K  
 -145.87  
 -144.94  
 -141.30  
 -135.25  
 -130.77  
 -130.35  
 -129.41  
 -127.94  
 -126.97  
 -123.07  
 -119.48  
 -97.22

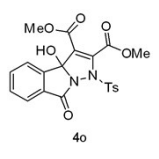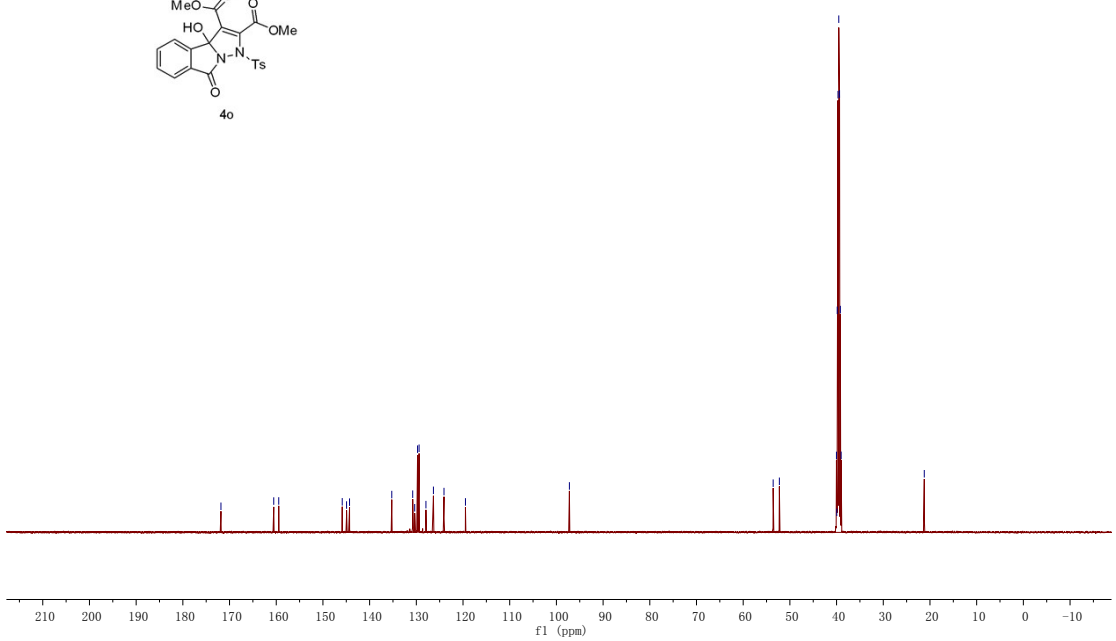

8.16  
 7.92  
 7.83  
 7.80  
 7.77  
 7.75  
 7.72  
 7.60  
 7.57  
 7.41  
 -6.85

-3.33  
 2.50  
 2.40  
 2.26

-0.01

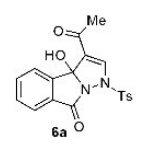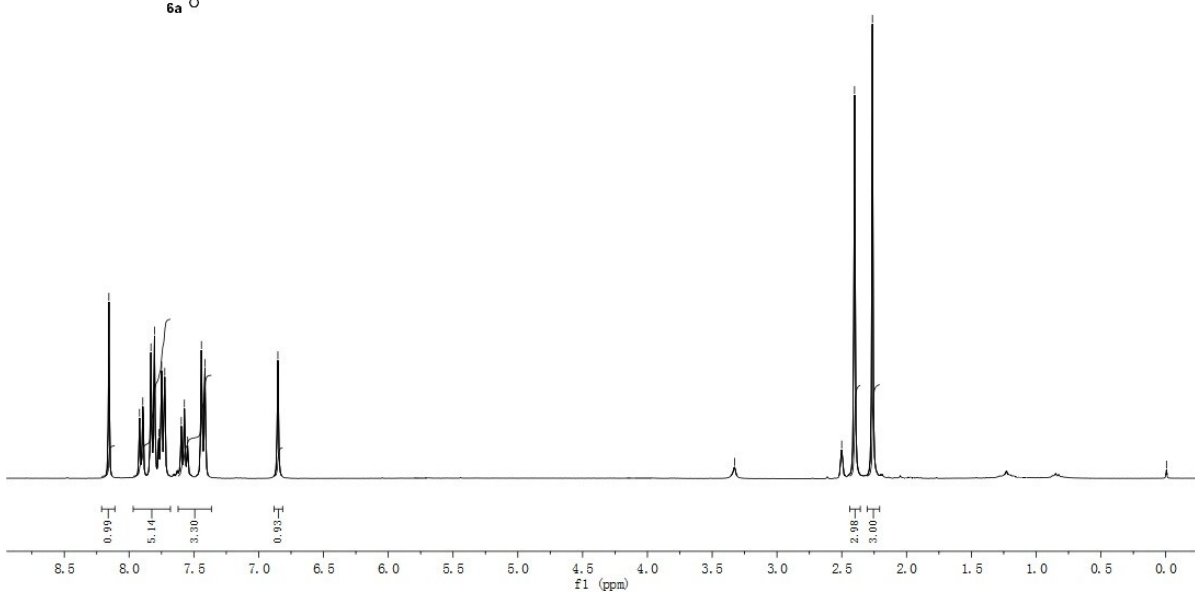

0.99  
 5.14  
 3.30

2.98  
 3.00



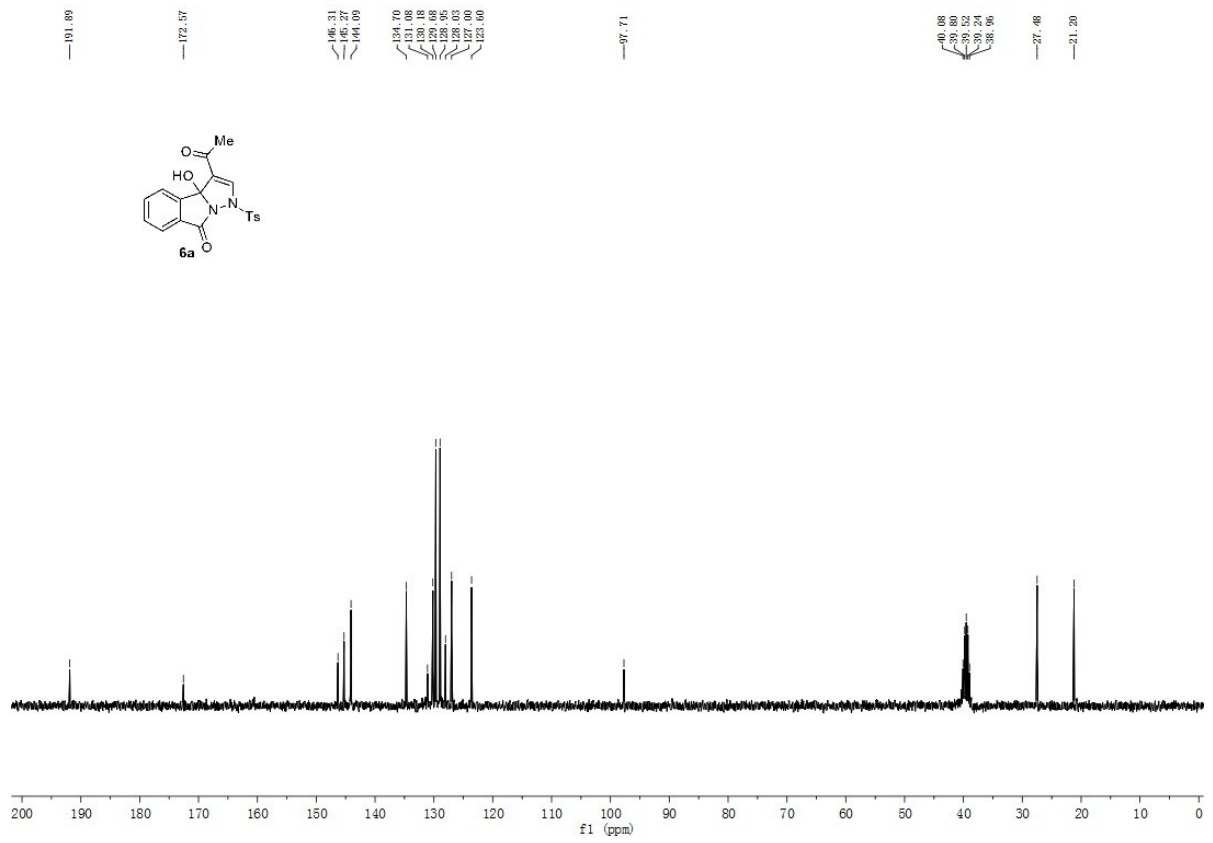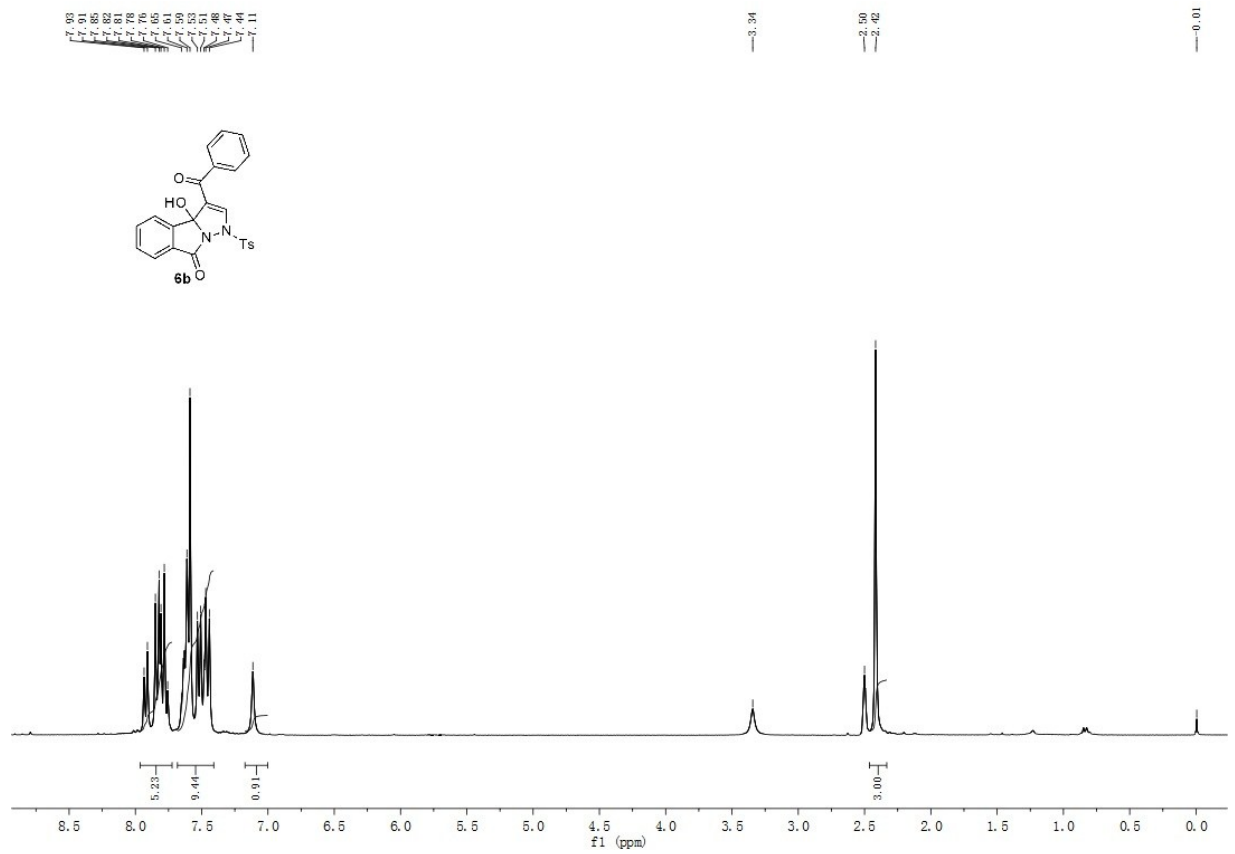

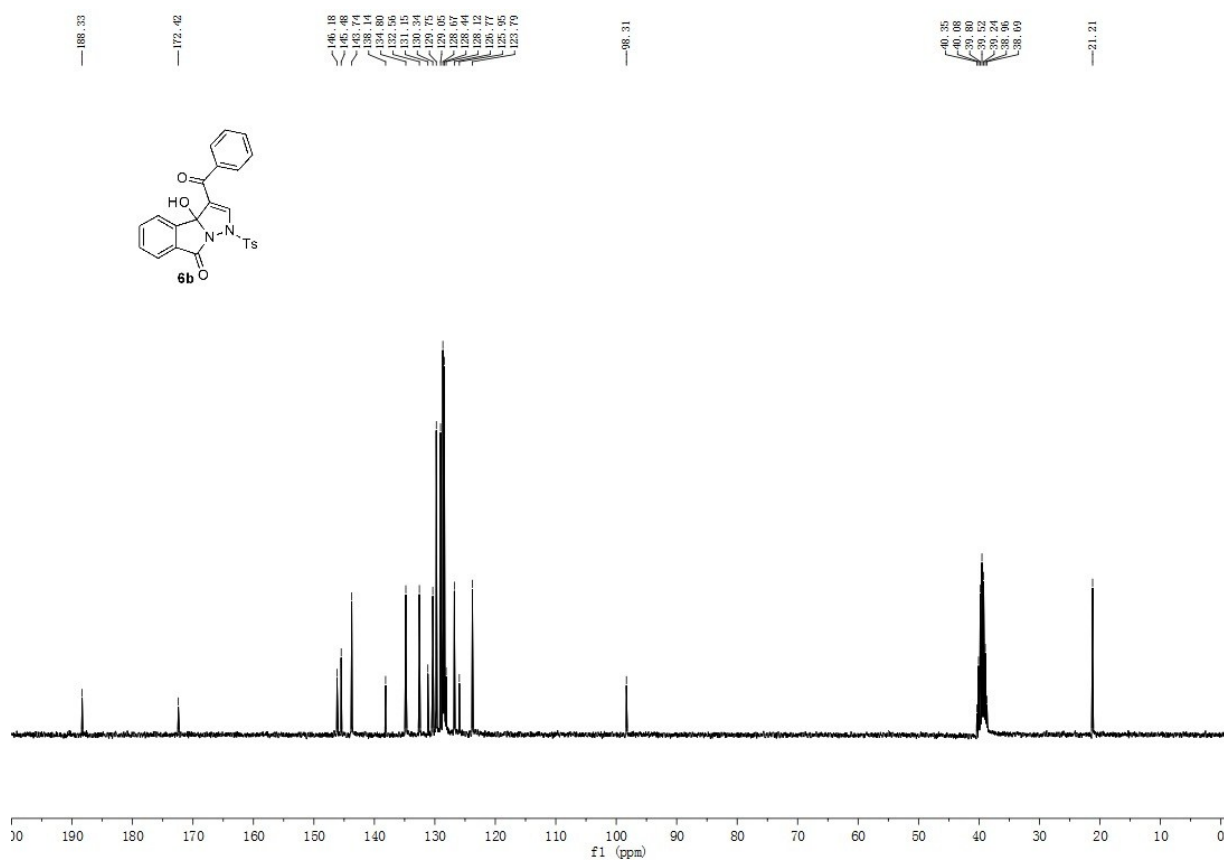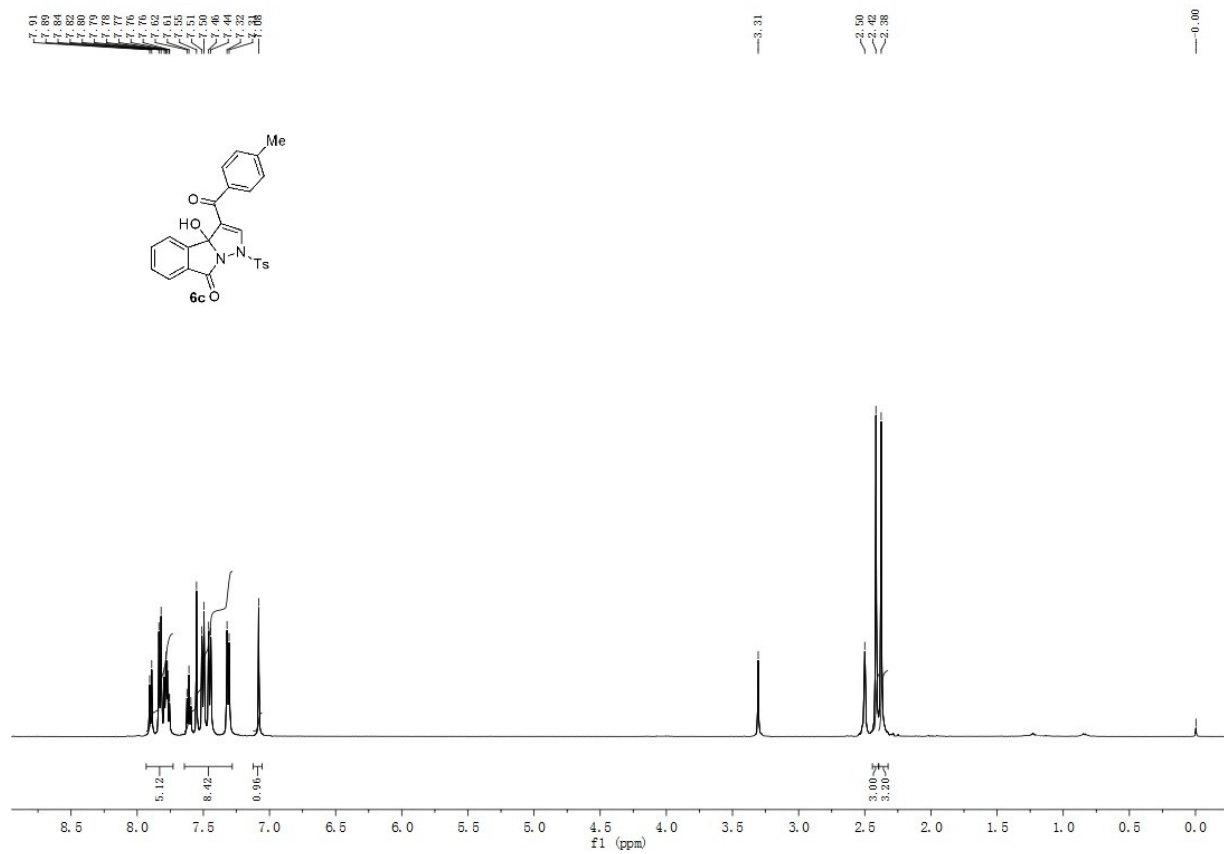

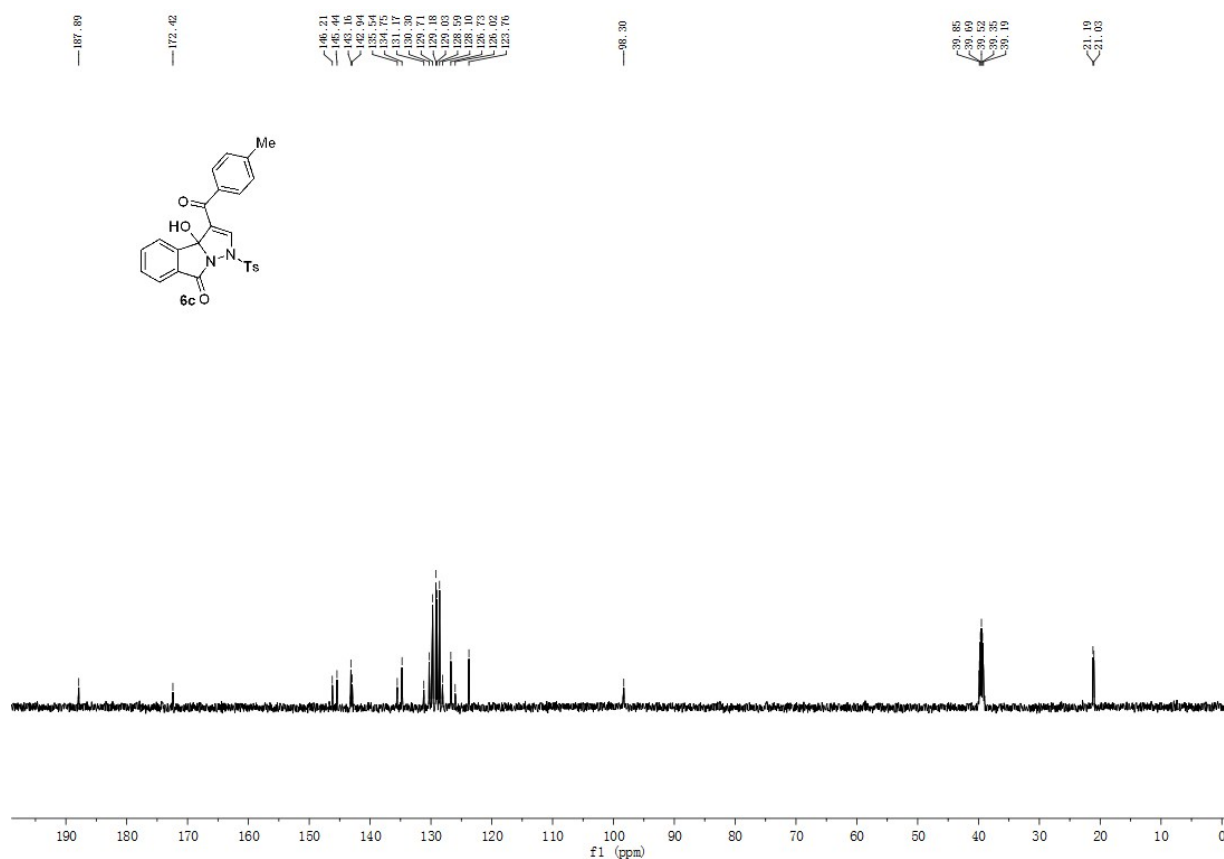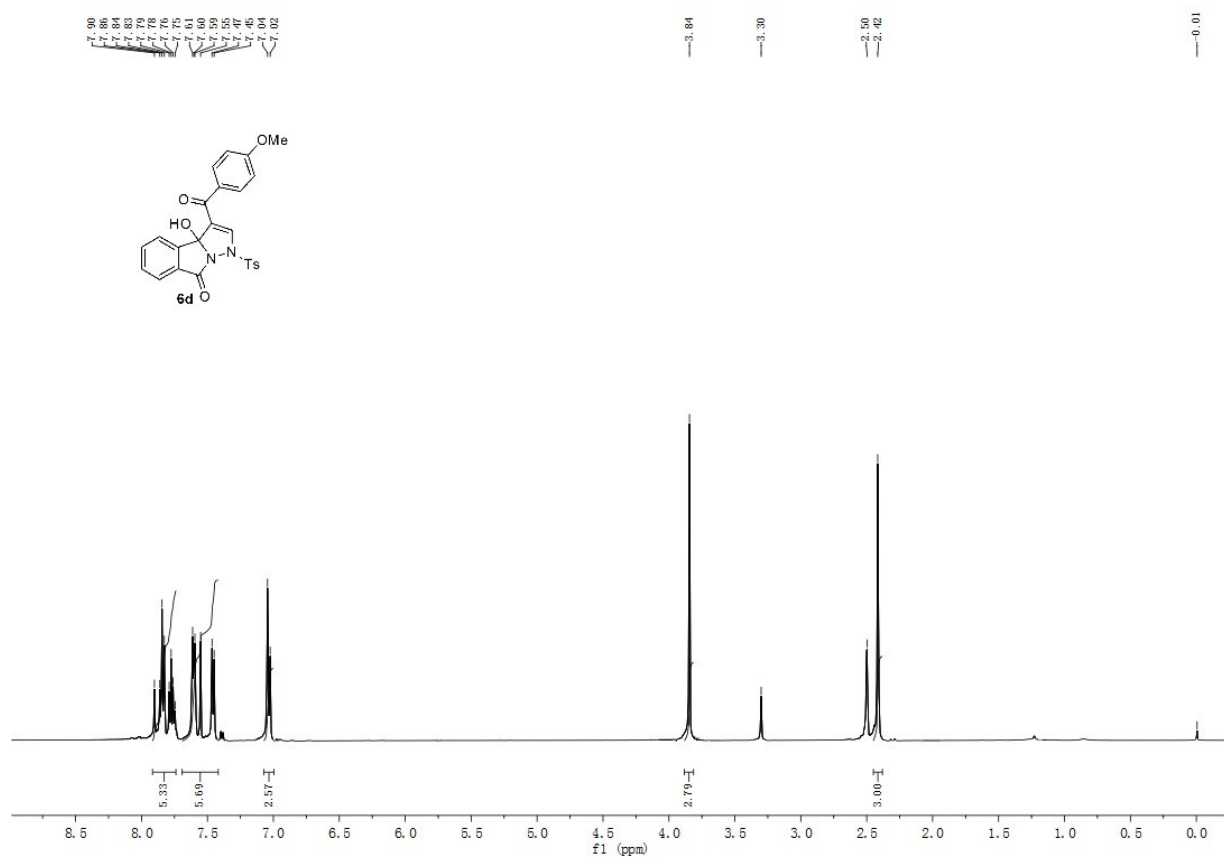

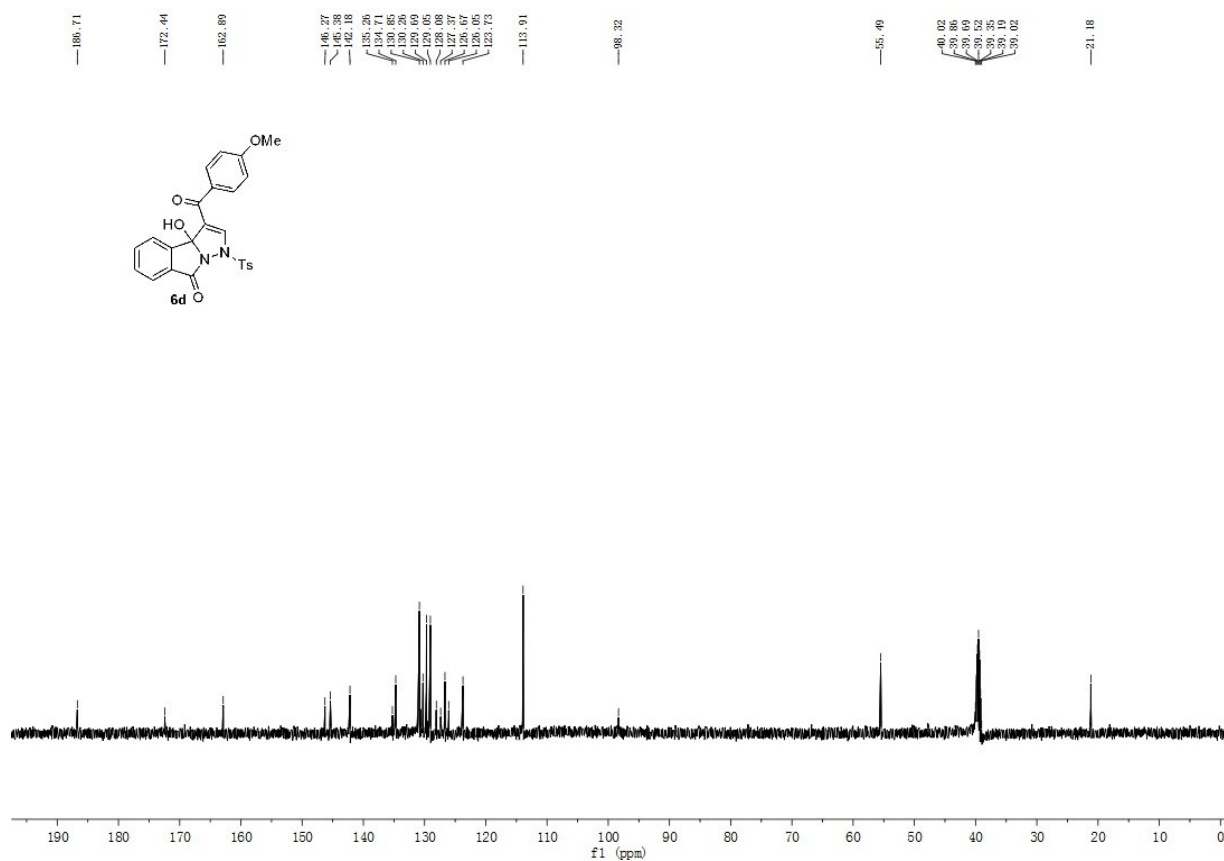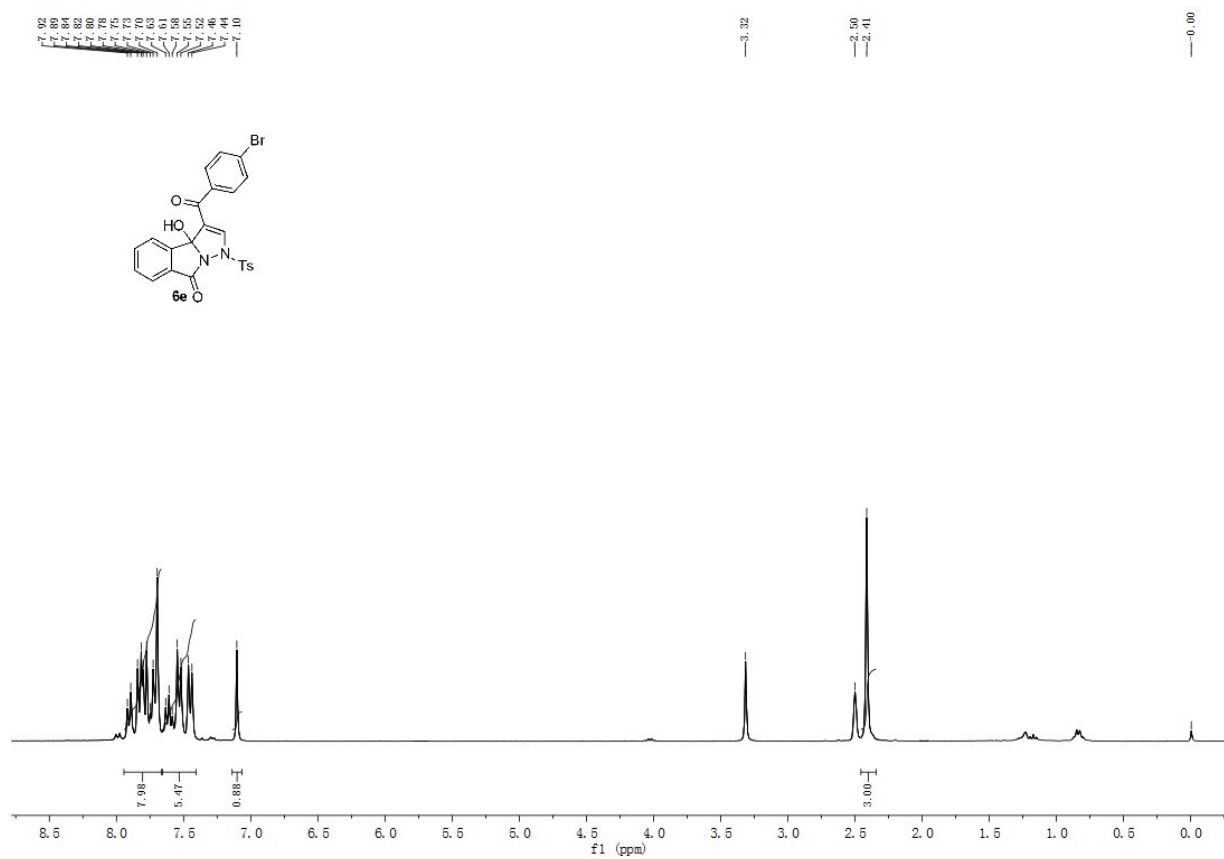

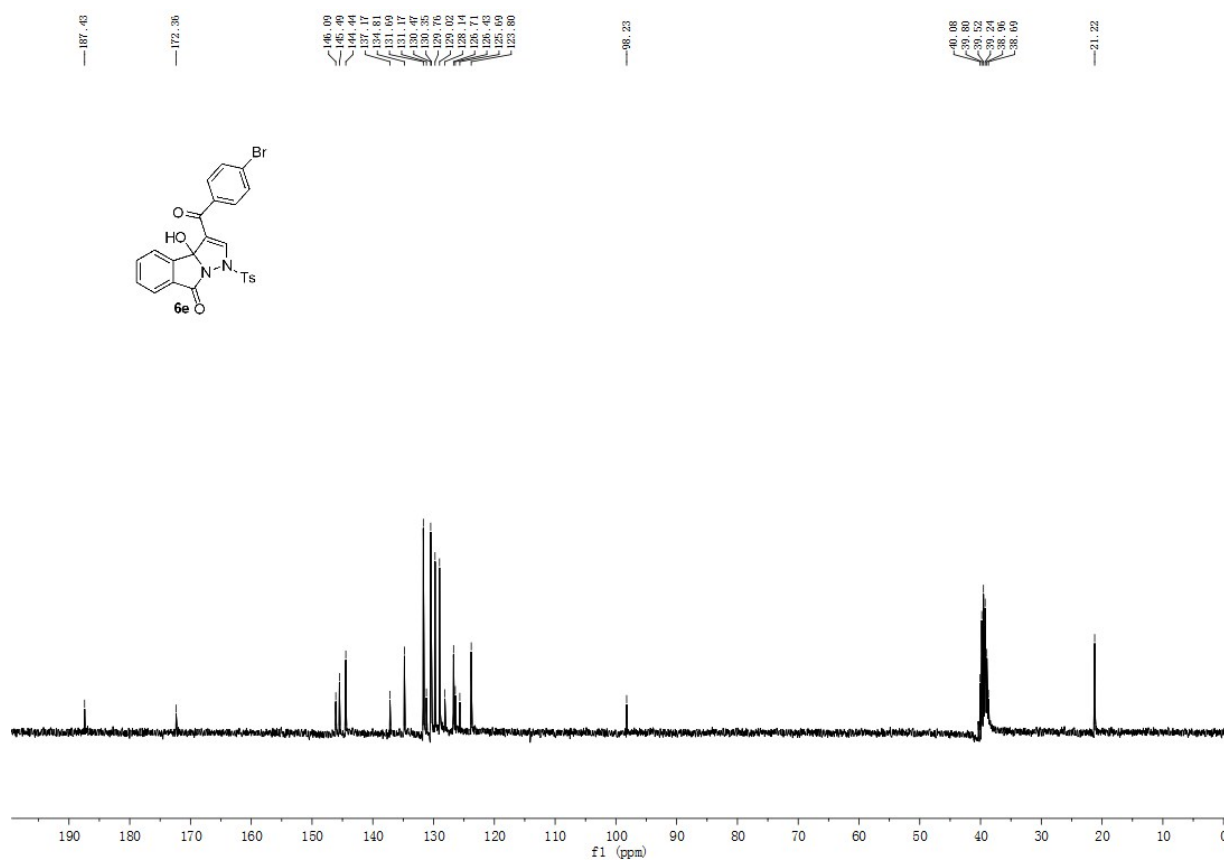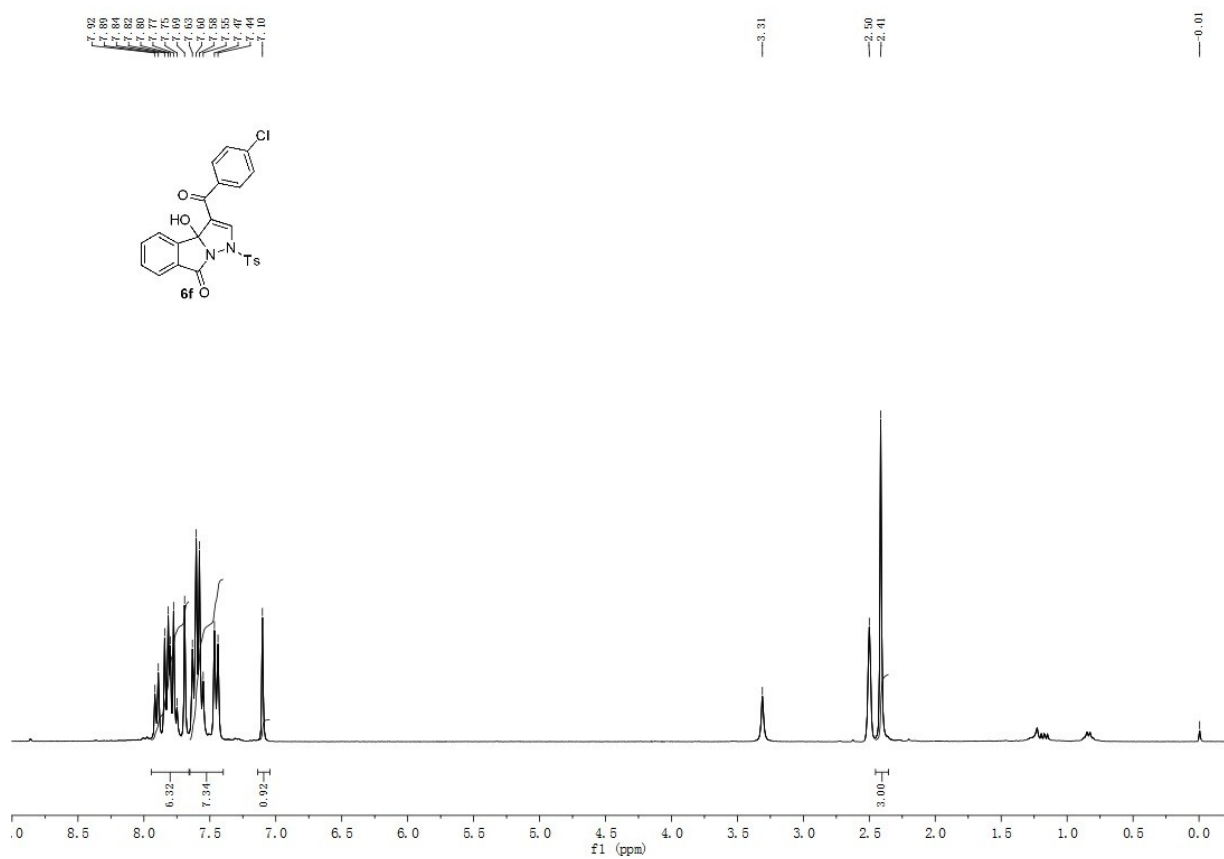

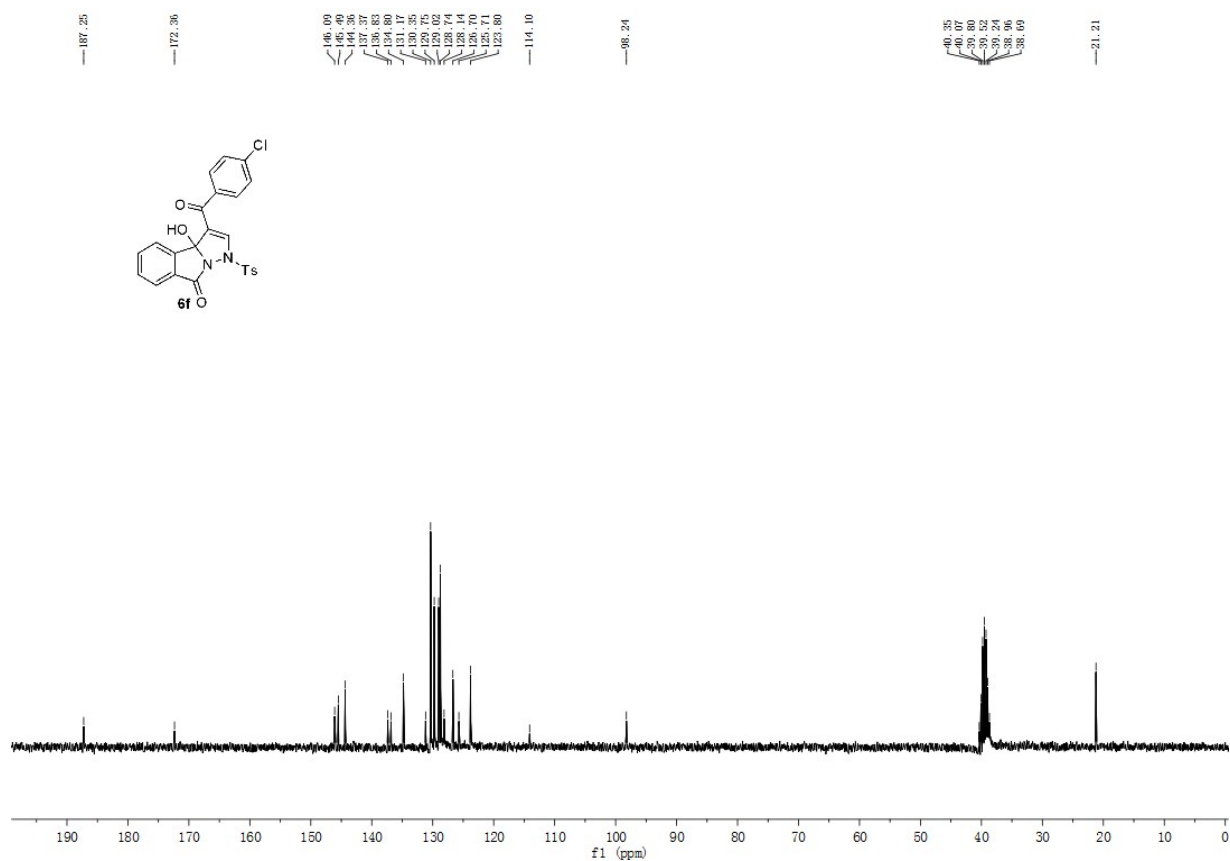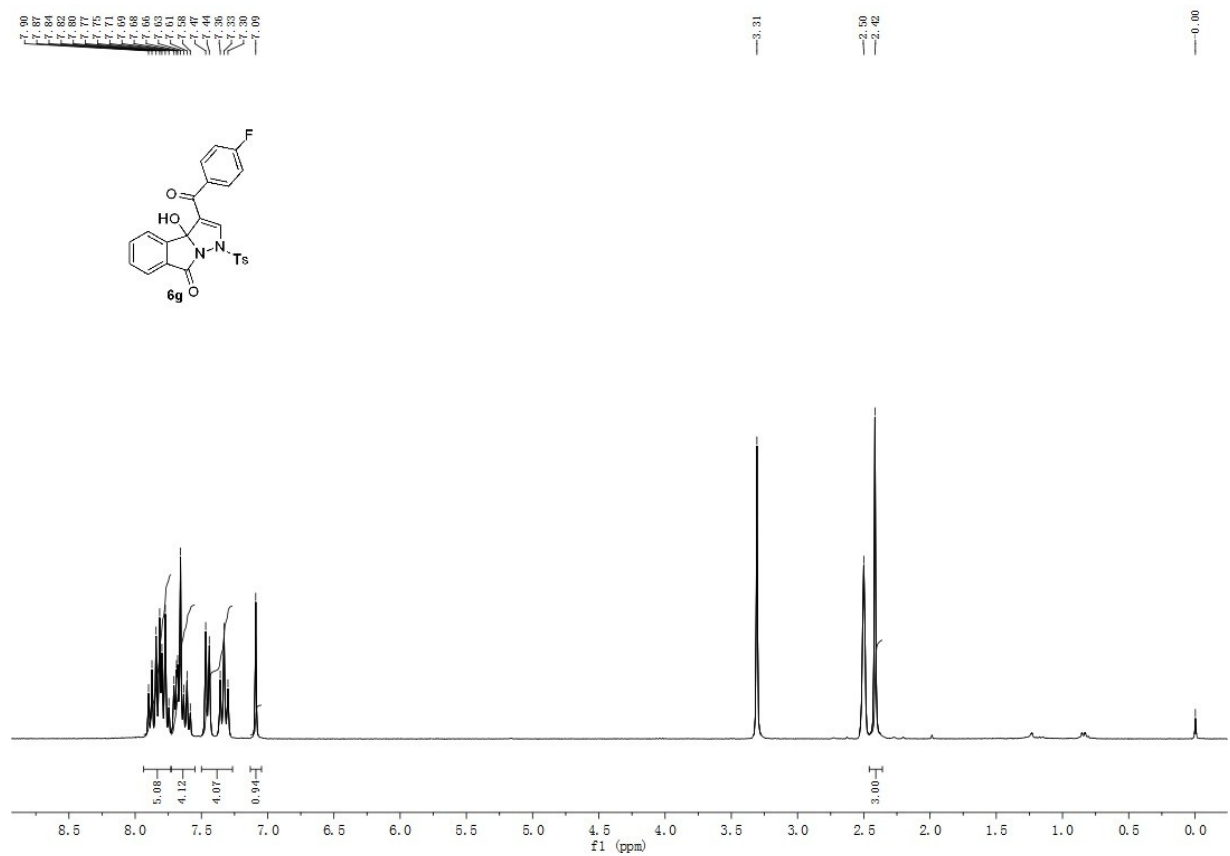

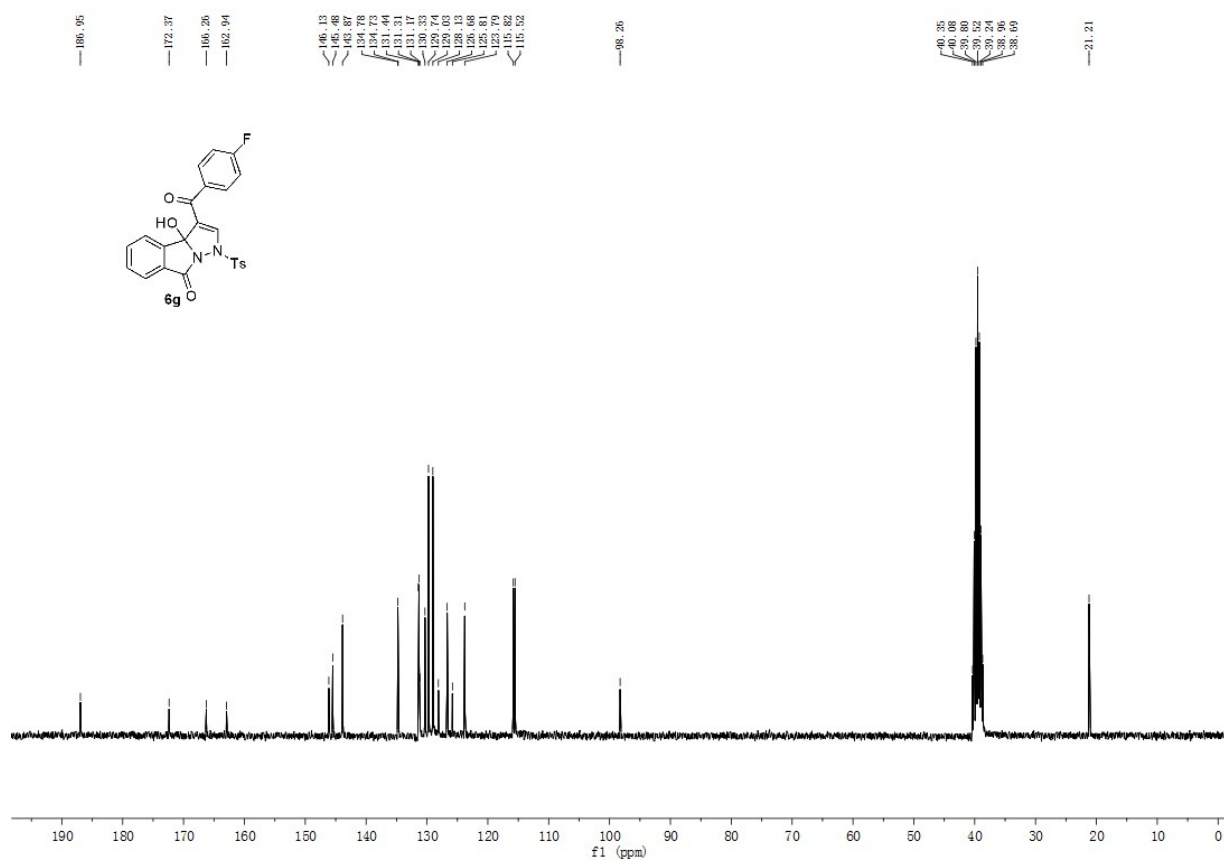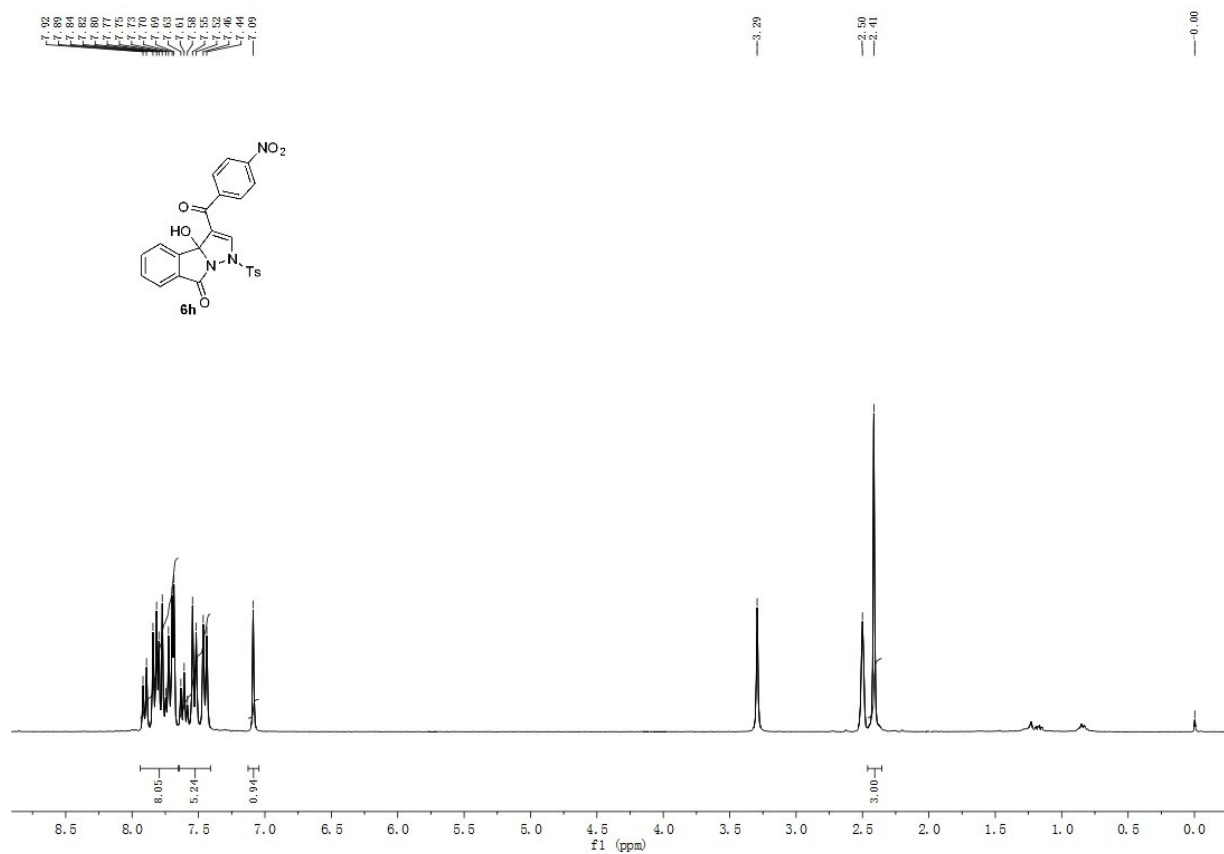

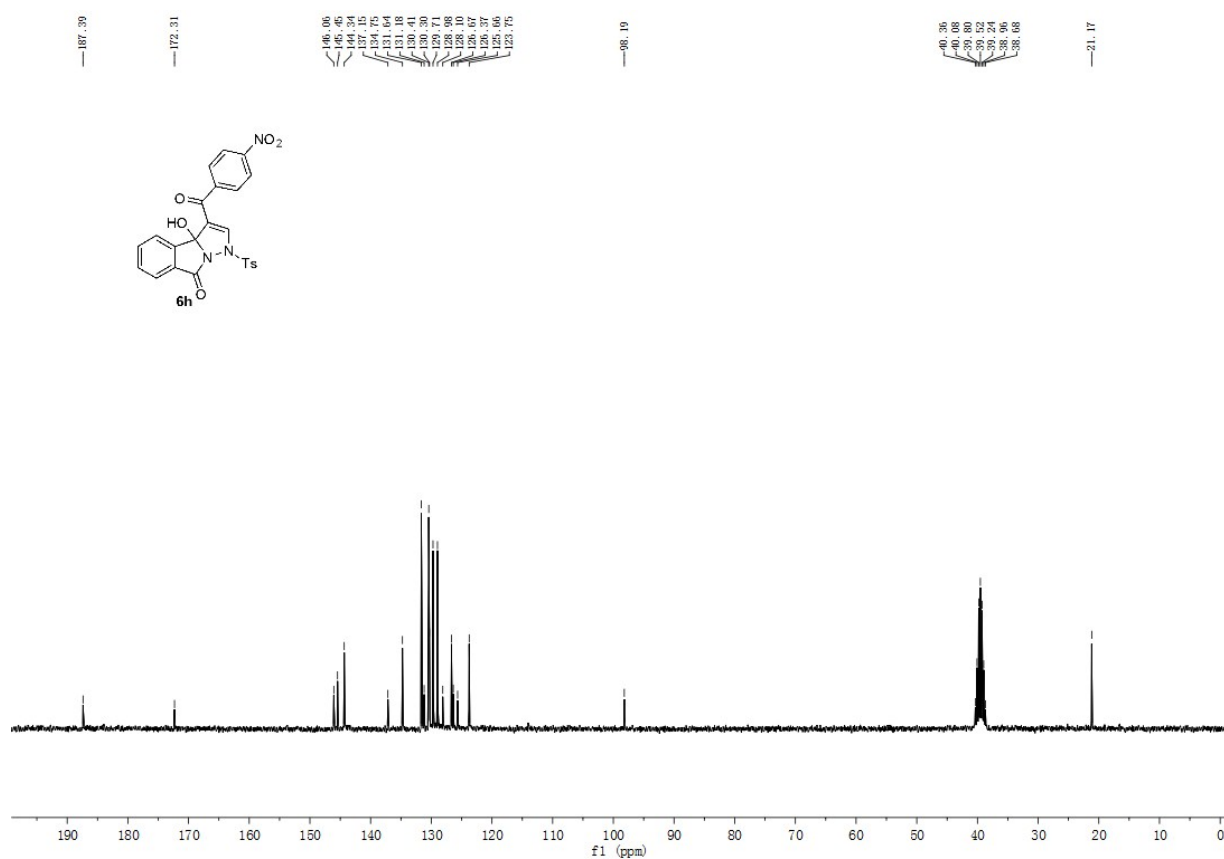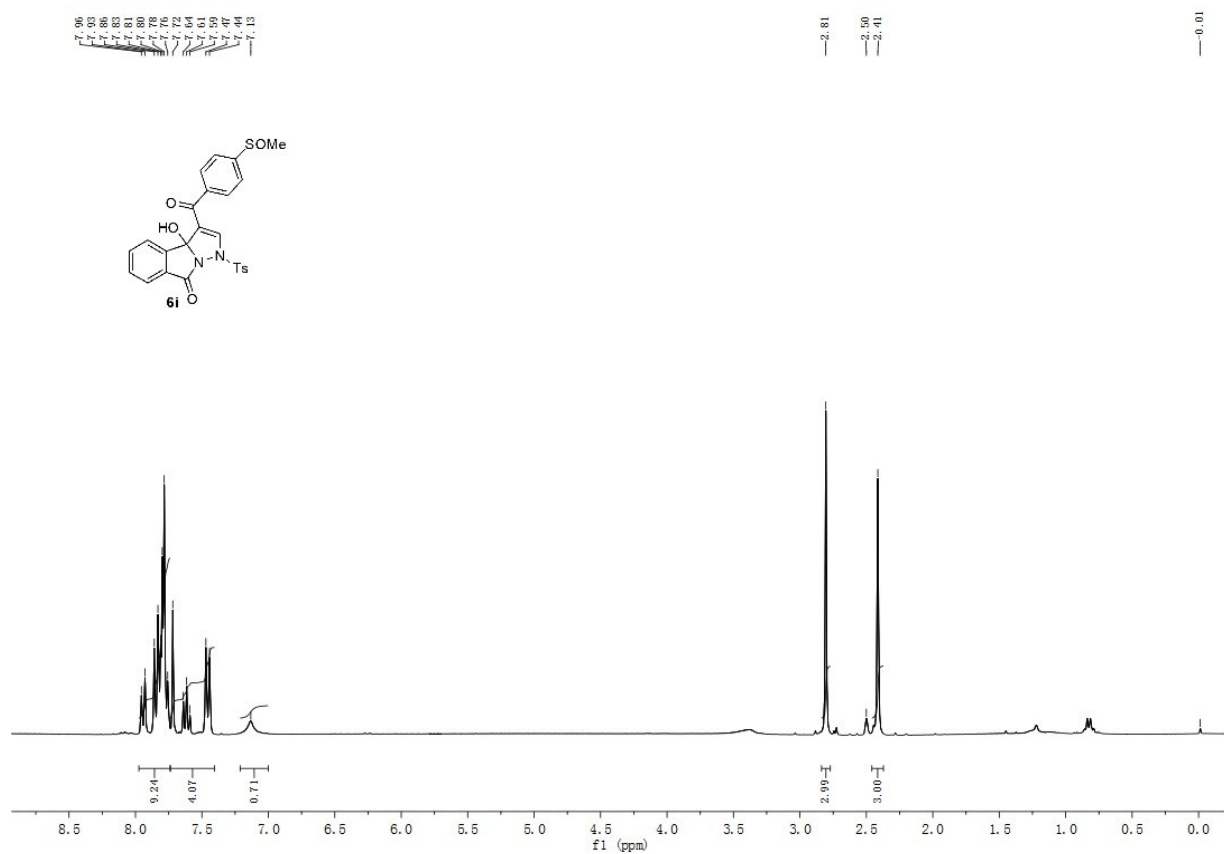



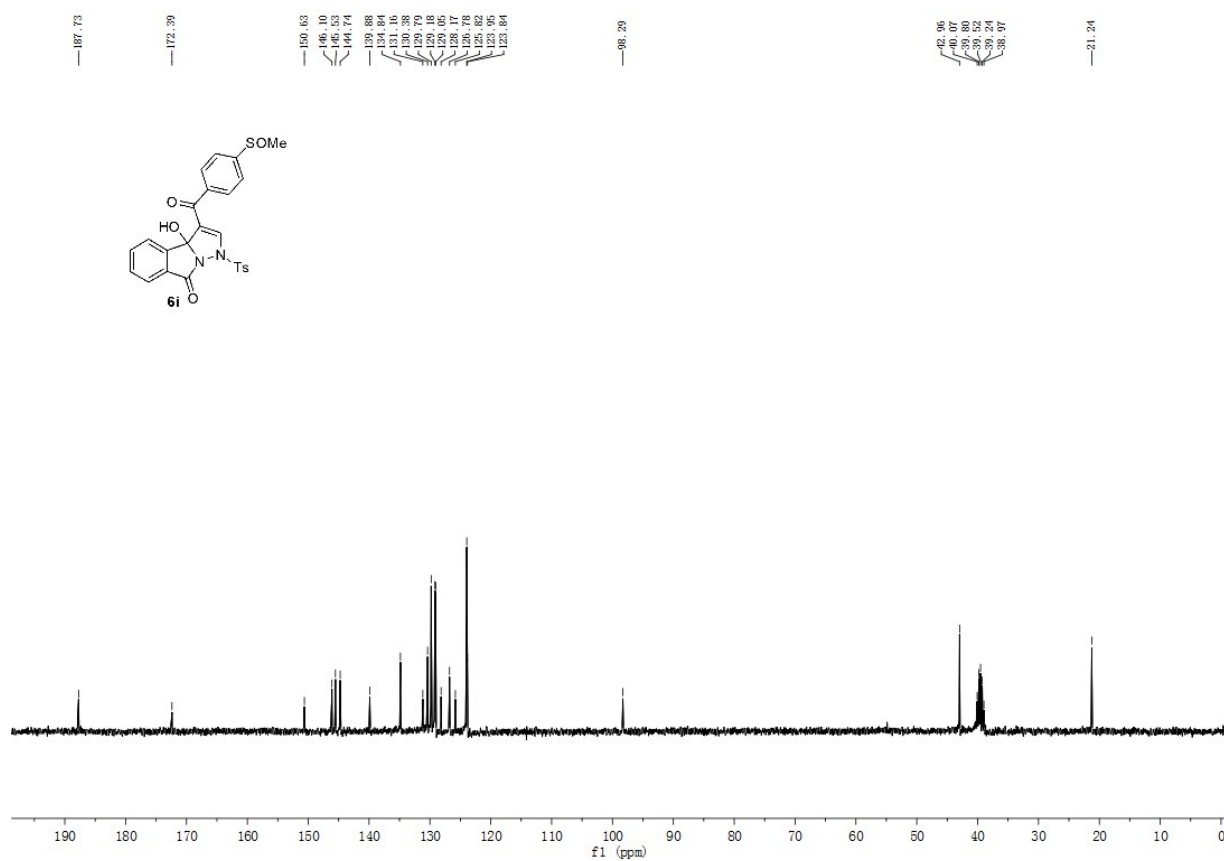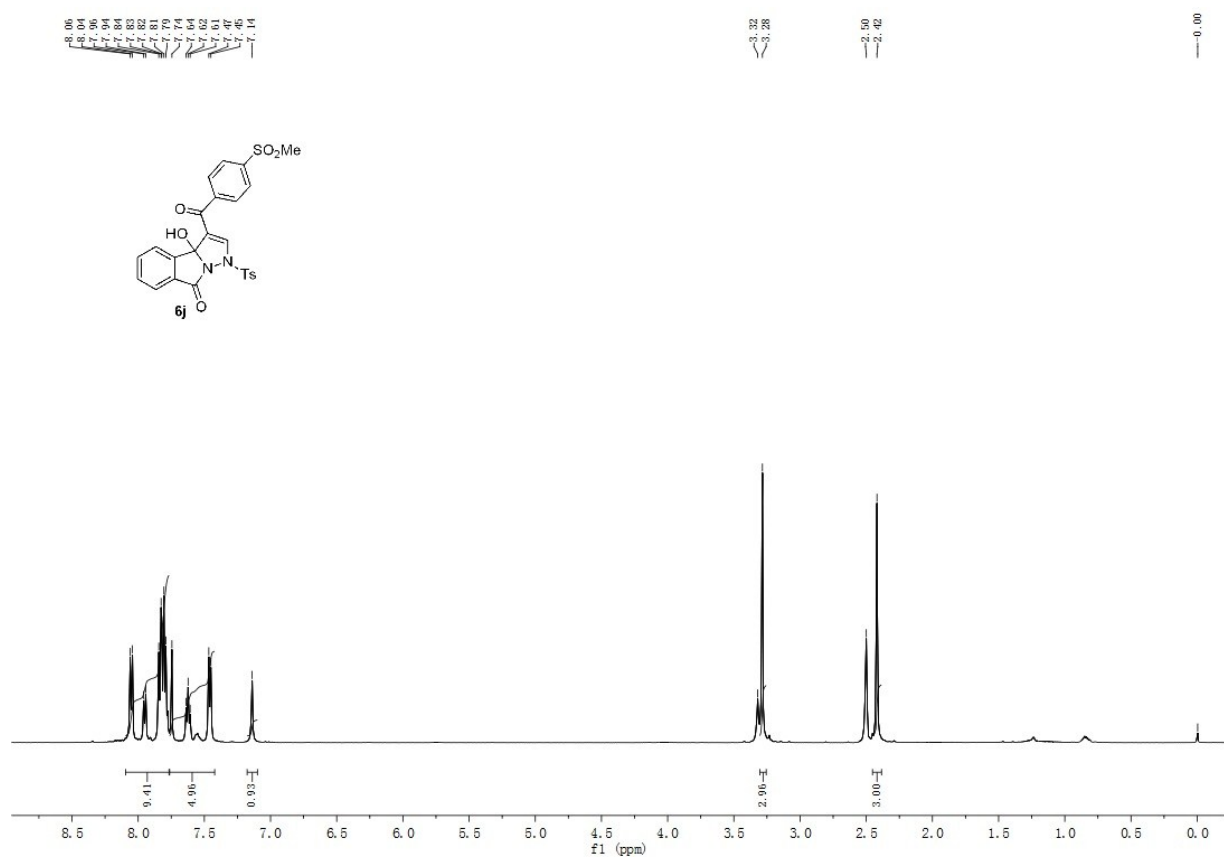

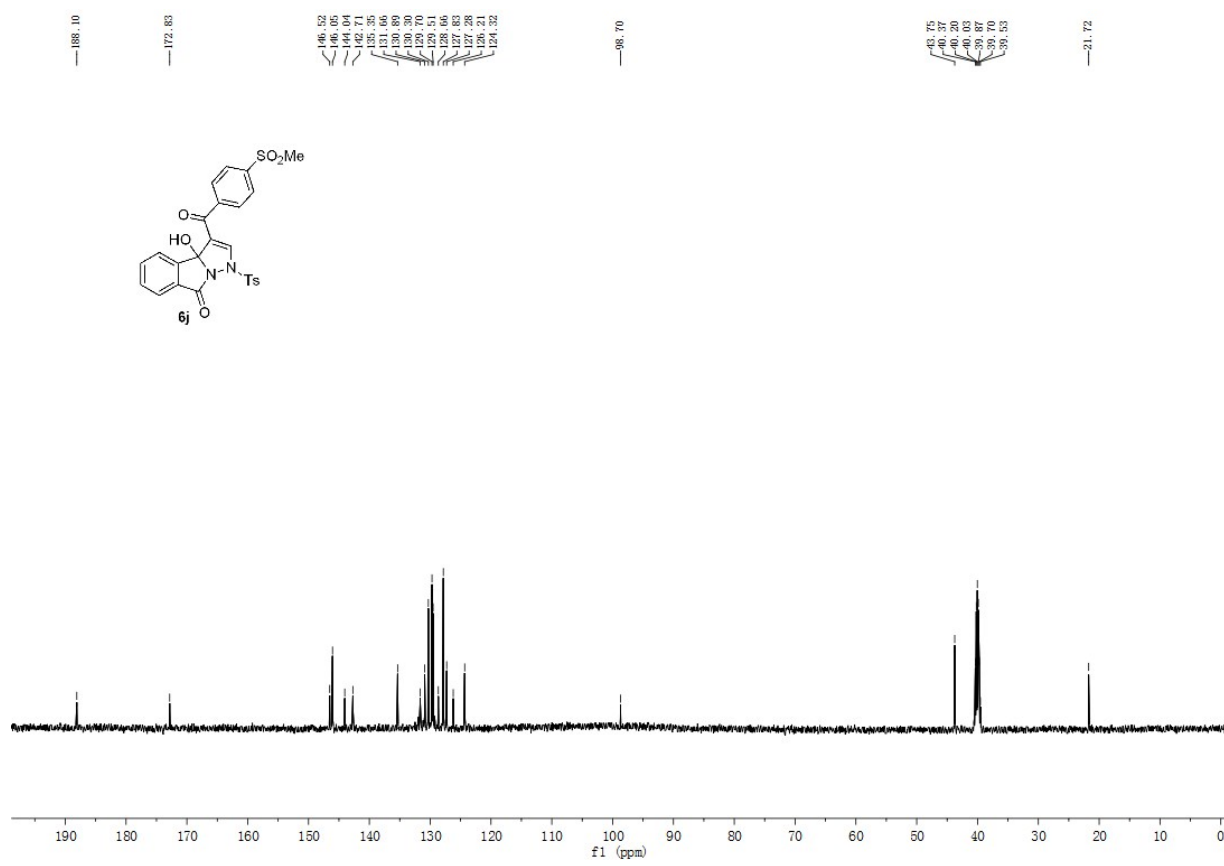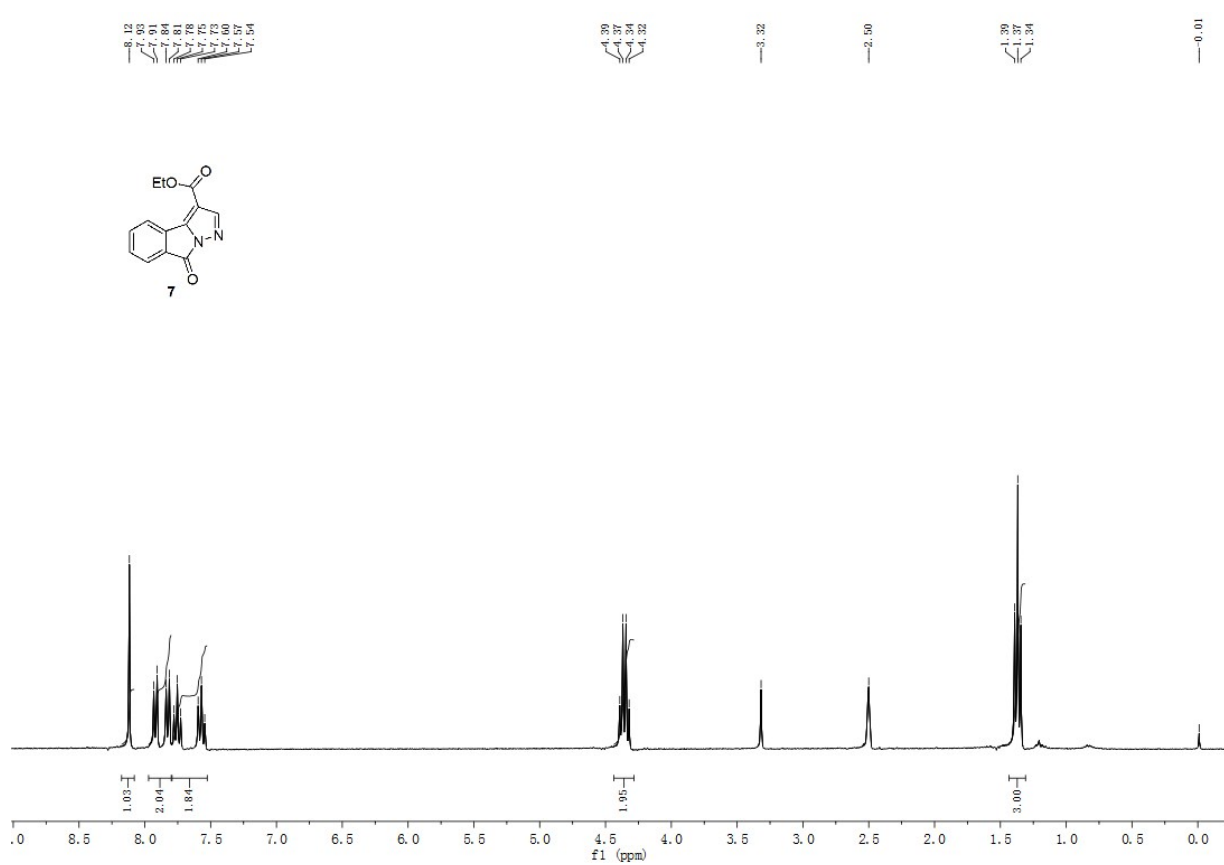

161.21  
159.55

146.76  
146.02

135.77

133.36  
130.00  
129.54  
124.13

111.05

40.97

40.08  
39.80  
39.24  
38.96

14.17

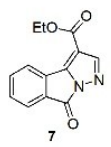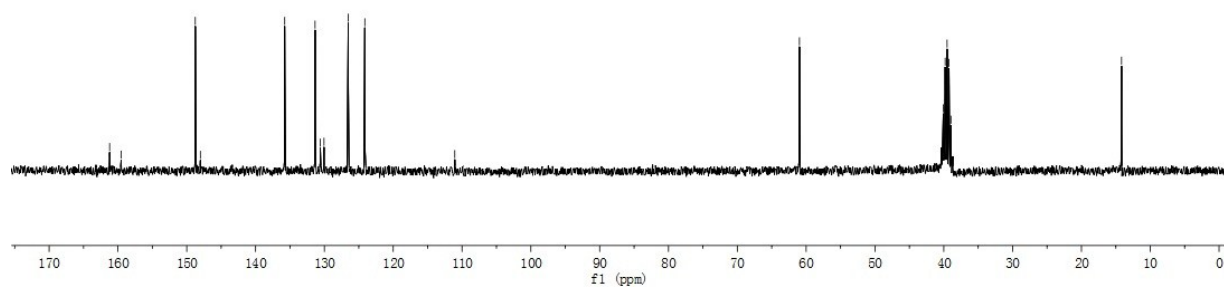

Supplement: c5ra17267e1.pdf [file c5ra17267e1.pdf]
